1

2

3 **River impoundments cause little change in fish boreal diversity, but clear**  
4 **species assemblage shifts**

5

6

7 Katrine Turgeon\*<sup>1</sup>, Christian Turpin<sup>2</sup> & Irene Gregory-Eaves<sup>1</sup>

8

9 <sup>1</sup>Department of Biology, McGill University, 1205 Docteur Penfield Avenue, Montreal, QC,

10 CANADA, H3A 1B1

11 <sup>2</sup>Hydro-Québec, Environment and Corporate Affairs, 75 René-Lévesque, Montréal, QC,

12 CANADA, H2Z 1A4

13

14 \*Corresponding author: [katrine.turgeon@mail.mcgill.ca](mailto:katrine.turgeon@mail.mcgill.ca)

15 **Abstract**

16 Hydroelectricity is often presented as a clean and renewable energy source, but river  
17 impoundment, regulation and fragmentation caused by dams have been reported to have varying  
18 effects on aquatic biodiversity and ecosystem functions. The effects of river impoundment on  
19 fish are often difficult to isolate because of the presence of confounding factors such as stocking,  
20 fishing, species introduction and other human activities. In our study, we examined changes in  
21 littoral fish communities over 20 years, using a network of sites located in remote boreal  
22 ecosystems (northern Québec, Canada) with minimal confounding pressures. We found little  
23 evidence of divergent temporal trends in contemporary diversity metrics in reservoirs relative to  
24 reference sites across three spatial scales (*i.e.*, sampling station, reservoir and hydroelectric  
25 complex). Using  $\beta$ -diversity analyses, we detected a high degree of stability in fish composition  
26 over time and space at the complex and reservoir scales. However, at the scale of the sampling  
27 station, we observed higher rates of species turnover coincident with the time of reservoir filling  
28 and shortly after. Likewise, species assemblage shifts that correlated with time since  
29 impoundment were detectable only at the sampling station scale. Our work shows that examining  
30 community data at different scales is key when trying to understand the anthropogenic impacts  
31 on fish biodiversity, and in designing impact assessment studies. Overall, the isolated effect of  
32 hydroelectricity production in these remote boreal ecosystems caused little change in fish  
33 diversity but resulted in species assemblage shifts.

34 **Keywords:**  $\beta$ -diversity; boreal reservoirs; fish; hydroelectric complex; multi-scale approach;  
35 Québec; species assemblages; upstream

36

## 37 **Introduction**

38           One of the most important challenge we face as a society is the increased demand for  
39 energy worldwide (SEforALL 2016). In response to this demand, many large dams are currently  
40 in operation, or are being constructed in developing economies to provide hydroelectricity (Grill  
41 et al. 2015, Winemiller et al. 2016). Even though hydroelectricity is often presented as a  
42 relatively clean, and renewable energy source (Teodoru et al. 2012), the regulation of river flow  
43 and fragmentation caused by dams can impact ecosystem functions and biodiversity (Rosenberg  
44 et al. 2000, Renöfalt et al. 2010).

45           Dams constructed for hydroelectricity production usually transform large rivers and  
46 surrounding lakes into a large reservoir, or a series of reservoirs. This transformation shifts the  
47 ecosystem regime from a lotic to a lentic one, and can change the direction of some important  
48 physical, chemical and biological processes (Friedl and Wüest 2002, Haxton and Findlay 2009).  
49 Upstream of the dam, reservoirs can experience variation in water levels and in flow outside of  
50 their natural amplitudes (Kroger 1973; Zohary and Ostrovsky 2011). Downstream of the dam,  
51 seasonal and interannual streamflow magnitude and variability are generally reduced (Friedman  
52 et al. 1998, Graf 2006) but can also be increased (Cushman 1985). These alterations can  
53 influence the biodiversity, abundance, distribution and community structure of many taxa of the  
54 aquatic food web (*e.g.*, Nilsson and Berggren 2000, Furey et al. 2006, Vörösmarty et al. 2010).

55           The effects of dams and their management on fish species richness and diversity have  
56 been extensively studied, but divergent effects have been described. At regional and global  
57 scales, links between river fragmentation or regulation and the homogenization of fish  
58 communities have been reported (Poff et al. 2007, Villéger et al. 2011, Liermann et al. 2012). In

59 smaller scale studies, some authors found a decrease in richness/diversity in reservoirs and  
60 regulated streams when compared to reference sites (examples from cross-sectional studies;  
61 Reyes-Gavilán *et al.* 1996; Sá-Oliveira *et al.* 2015), some found lower richness/diversity after  
62 impoundment when compared to before impoundment conditions (examples from longitudinal  
63 studies; Pyron *et al.* 1998; Gehrke, Gilligan & Barwick 2002; Mérona, Vigouroux & Tejerina-  
64 Garro 2005; Lima *et al.* 2016), and many have found no difference (see meta-analysis from Liew  
65 *et al.* 2016, see Guenther and Spacie 2006 and Irz *et al.* 2006 for cross-sectional examples, and  
66 Martinez *et al.* 1994 for a longitudinal example).

67         Although the presence and direction of change in fish richness/diversity across smaller  
68 scale studies are divergent, a shift in fish assemblages was observed in the majority of the  
69 studies. The direction and magnitude of the change in fish assemblages depend on a series of  
70 mechanisms. The main suggested mechanisms are: 1) barriers to movement caused by dams,  
71 which detrimentally affect migratory fish (Martinez *et al.* 1994, Gehrke *et al.* 2002, Guenther and  
72 Spacie 2006), 2) drastic changes in habitat, from lotic to lentic conditions, favoring facultative  
73 riverine and opportunistic species in reservoirs (Nelson and Walburg 1977, Rodriguez Ruiz  
74 1998, Penczak and Kruk 2005, Affonso *et al.* 2015), 3) alterations in flow and water levels (*e.g.*,  
75 drawdown) that can affect temperature regimes and water quality (Ward and Stanford 1983,  
76 1995, Kruk and Penczak 2003, Sutela and Vehanen 2008), and finally 4) introductions of  
77 invasive and exotic species in reservoirs that can modify trophic interactions in the food web  
78 (Johnson *et al.* 2008, Pelicice and Agostinho 2008, Clavero and Hermoso 2010).

79         Clearly, earlier works have provided valuable information about the effects of  
80 hydroelectricity production on fish communities, but the lack of consensus across studies  
81 impedes the development of strong conclusions regarding the effects of hydroelectrical facilities

82 on fish communities. Furthermore, very few studies have adequate information on fish  
83 communities as many do not span both before and after impoundment, nor extend over a long  
84 period (*i.e.*, after the trophic surge, Grimard and Jones 1982, Turgeon et al. 2016). Likewise,  
85 comparable data from reference sites are often lacking. Isolating the effects of hydroelectricity  
86 production from other confounding factors such as land use changes, stocking and the  
87 introduction of invasive species is also often hard, if not impossible in some systems (Cumming  
88 2004). Finally, the ecoregion, and associated physico-chemical and biological conditions of  
89 impounded rivers and reservoirs can strongly affect the response in fish communities (Rosenberg  
90 et al. 1997, Vörösmarty et al. 2010).

91 In this study, we examined changes in fish diversity and species assemblages in a long-  
92 term dataset collected by Hydro-Québec for the La Grande hydroelectric complex and for the  
93 Sainte-Marguerite complex. The time series for each complex span from before the construction  
94 to 10 or 20 years after the start of its operation. This dataset provides us with a rare opportunity  
95 to isolate the effect of impoundment on fish communities because confounding factors were  
96 minimal. Moreover, no fish stocking program was implemented and there are no known invasive  
97 species. A second strength of the dataset is that the large network of sampling stations ranging  
98 from upstream to downstream stations of different habitats as well as reference sites allows for a  
99 thorough evaluation of the impact associated with an hydroelectricity project. We analysed data  
100 from a total of 27 sampling stations distributed across 4 reservoirs from two complexes. Finally,  
101 the extensive temporal nature of the dataset allows us to quantify long-term changes in fish  
102 communities in large boreal reservoirs.

## 103 **Methods**

### 104 **Study sites**

105 *La Grande complex* - The La Grande Rivière mega-hydroelectric complex (hereafter  
106 called the LG complex) is located on the eastern side of James Bay (Québec, Canada), and the  
107 whole region is situated on the Canadian Shield. The LG complex resulted in the creation of  
108 several large reservoirs (Table 1, Fig. 1) and in the diversion of three main rivers, the  
109 Caniapiscou (water flow at its mouth reduced by 45%), the Eastmain (water flow at its mouth  
110 reduced by 90%) and the Opinaca. Through these substantial hydrological inputs, the average  
111 annual flow in La Grande Rivière has increased from approximately  $1700 \text{ m}^3 \cdot \text{s}^{-1}$  to  $3400 \text{ m}^3 \cdot \text{s}^{-1}$ ,  
112 and its mean winter flow is 8 to 10 times higher than before. At the onset of the hydroelectricity  
113 project, the territory was free of any industrial activity and sparsely occupied by native Cree so  
114 confounding factors were minimal.

115 The construction of the complex was carried out in two phases. In Phase I (1973-1985),  
116 three power stations were built along La Grande Rivière and each has a reservoir (Robert-  
117 Bourassa, La Grande 3 and La Grande 4; Fig. 1). The oldest reservoir is Robert-Bourassa  
118 (formerly known as La Grande 2) and was impounded in November 1978. To increase flows in  
119 the La Grande Rivière for hydroelectricity production, three rivers were partially diverted. The  
120 Eastmain and Opinaca rivers were cut off in 1980 to create the Opinaca reservoir. The reservoir  
121 Opinaca was impounded in April 1980 and flows into Robert-Bourassa reservoir via the Boyd-  
122 Sakami diversion. To the east, the northward-flowing Caniapiscou River was cut off in October  
123 1981 to create Caniapiscou reservoir. Caniapiscou reservoir is the largest in the complex, which  
124 drains into LG4 reservoir via the Laforge diversion and regulate the inter-annual flow in the La

125 Grande Rivière. In Phase II (1987-1996), one new reservoir was created (Laforge I; Fig. 1), and  
126 five additional power stations were constructed along the river (La Grande 1, La Grande 2A,  
127 Laforge I, Laforge II and Brisay), increasing the average annual flow to  $4400 \text{ m}^3 \cdot \text{s}^{-1}$ .

128 In the LG complex, water in reservoirs is naturally highly transparent, well oxygenated,  
129 slightly acidic (pH 5.9 to 6.9), with low mineral content (specific conductivity 8 to  $30 \mu\text{S}/\text{cm}$ )  
130 and poor in nutrients ( $0.004$  to  $0.01 \text{ mg} \cdot \text{L}^{-1}$  total P). In this study, we focused on three reservoirs  
131 in the LG complex: the Robert-Bourassa, the Opinaca and the Caniapiscau reservoirs (Table 1,  
132 Fig. 1). Each of the three reservoirs of the LG complex was paired with a reference site (*i.e.*, a  
133 natural lake in proximity to the reservoir; represented by stations starting with “REF” in the  
134 figures; Fig. 1). In Robert-Bourassa reservoir, fish community data were collected in one station  
135 downstream of the dam (“DO”; Fig. 1) and in six stations upstream of the dam (three were rivers  
136 or streams before being a reservoir (“UR”) and three were lakes (“UL”; Fig. 1). This distinction  
137 is important because we expected that UR stations would demonstrate a more pronounced  
138 change in diversity and fish assemblages than UL stations because of the distinct change in  
139 habitat. For the Opinaca reservoir, data were collected from two downstream stations and four  
140 upstream stations (two UR and two UL). For Caniapiscau, data were collected from one  
141 downstream station and six upstream stations (six UL; Table 1, Fig. 1).

142 ***Sainte-Marguerite complex*** - The Sainte-Marguerite complex (SM) is located on the  
143 Moyenne-Côte Nord portion of the Canadian Shield (Eastern Québec, Canada), on the north  
144 shore of the Saint Lawrence estuary in Quebec (Fig. 1). The Sainte-Marguerite 3 dam (SM3) and  
145 reservoir were under construction from 1994 to 2001. SM3 was impounded in April 1998 and  
146 took 4 years to fill (1998 to 2002). The reservoir SM2 was created in 1954 and is not managed  
147 by Hydro-Québec. The Sainte-Marguerite watershed is relatively free of anthropogenic

148 perturbation. Fish community data were collected in two stations upstream of the SM3 dam (two  
149 UR), in one station in SM2 reservoir that is downstream of SM3 (one UR), and one reference site  
150 station (Table 1, Fig. 1).

### 151 **Field sampling**

152 In Robert-Bourassa and Opinaca reservoirs, littoral fish communities were sampled  
153 annually from 1978 to 1984, and then in the years 1988, 1992, 1996 and 2000. In Robert-  
154 Bourassa, the pre-impoundment period corresponds to data collected in 1978 whereas in Opinaca  
155 this period corresponds to the years 1978 and 1979. In Caniapiscou reservoir, fish communities  
156 were sampled annually from 1980 to 1982, and in the years 1987, 1991, 1993, 1997 and 1999. In  
157 Caniapiscou, pre-impoundment data correspond to the years 1980-1981. For the three reservoirs,  
158 sampling occurred monthly from June to September-October, with a total of five sampling times  
159 per season in the Robert-Bourassa and Opinaca reservoirs, and four times per season in  
160 Caniapiscou until 1995. After 1995, the fishing protocol was optimized to concentrate the  
161 sampling effort in July and August (Deslandes and Fortin 1994). To obtain comparable data from  
162 1978 to 2000, only data available for the months of July and August were used in this study.  
163 Sampling was performed using four multifilament gill nets 45.7 m in length x 2.4 m in depth, set  
164 in pairs. Each net pair consisted of a piece of 7.6 cm stretched mesh attached to an experimental  
165 gill net (where mesh sizes ranged between 2.5 to 10.2 cm). One pair of nets was set  
166 perpendicular to the shore and the other pair was set near the shore (within 5 m from the shore).  
167 Each sampling period lasted 48 h until 1982 and 24 h from 1983 and on. When the effort lasted  
168 48 h, the nets were nevertheless visited every 24 h. The fish caught were counted, measured and  
169 weighed. In SM3 and SM2, the fish community was sampled in 1992, 1996, 2005 and 2011. In  
170 SM complex, pre-impoundment data correspond to the years 1992 and 1996. Sampling was



171 performed using the same nets as in LG complex. No seine net or minnow traps were used in this  
172 sampling program. Thus, the dataset likely underestimates the presence and abundance of small  
173 species from the littoral area. Likewise, there is the potential that abundance and prevalence of  
174 pelagic species were underestimated because no gill nets were set in the pelagic zone. Despite  
175 these caveats, a long-term and consistent sampling program was established.

176 Starting in 1978, changes in water quality in the photic zone (0 - 10 m) were monitored at  
177 the same sampling stations in LG complex. Water quality variables measured were water  
178 temperature, water transparency (measured as secchi depth), dissolved oxygen concentration, pH  
179 and specific conductivity (all measured with an Hydrolab multiprobe). Details of the  
180 methodology used in the collection and analysis of these data were presented by Fr chette  
181 (1980).

## 182 **Statistical analyses**

### 183 *Contemporary diversity metrics*

184 Diversity was assessed with extrapolated species richness, Pielou's J Evenness index, and  
185 Shannon's H' diversity index to describe different aspects of community diversity (Purvis and  
186 Hector 2000). The extrapolated species richness represents the number of species for a given  
187 standardized number of net lifts per sampling station in July and August. This metric can be  
188 based on either the chao, jackknife, second-order jackknife (Jack2) or bootstrap richness  
189 estimators and computed with the function specpool in the vegan R package v. 2.4-1 (Oksanen et  
190 al. 2016). We found that richness estimators were strongly correlated (mean  $\pm$  SD  $r^2 = 0.89 \pm$   
191  $0.07$ ; range = 0.77 to 0.98) and thus decided to focus on the Jack2 metric because this method is  
192 amongst the most recommended nonparametric resampling measures (Brose et al. 2003).

193 Shannon's  $H'$  diversity index ( $H' = -\sum_{i=1}^R p_i \ln p_i$ ) takes evenness and species richness into  
194 account and quantifies the uncertainty in predicting the species identity of an individual that is  
195 taken at random from the dataset and where  $p_i$  is the proportion of individuals belonging to the  $i^{\text{th}}$   
196 species in the dataset. Pielou's  $J'$  Evenness index ( $J' = \frac{H'}{\ln S}$ ) ranges from near 0 (indicating  
197 pronounced dominance) to near 1 (indicating an almost equal abundance of all species) and  $H'$  is  
198 the Shannon's  $H'$  diversity index where  $S$  is the total number of species.

199 To assess if river impoundment influences contemporary diversity metrics, we used  
200 General Linear Mixed Effects Models (glmm; applying the lme function in nlme package v. 3.1-  
201 128) to examine changes in diversity metrics over time in impacted stations in relation to  
202 reference sites. Here, we were interested in the slope of the relationship (testing if it was  
203 significantly different from zero) and whether the regression slope of impacted stations differed  
204 from that of reference sites (*i.e.*, focusing on the interaction term between time since  
205 impoundment [TSI] and impacted vs. reference sites [RI] denoted as [TSI\*RI], Table 2). We  
206 examined the effect of river impoundment on contemporary diversity metrics at three spatial  
207 scales: at the hydroelectric complex scale (pooling data from impacted sampling stations across  
208 the three La Grande reservoirs and comparing it to the data pooled from three reference sites), at  
209 the reservoir scale (pooling data from all impacted sampling stations for a given reservoir and  
210 comparing these results with the reservoir's reference site) and at the sampling station scale  
211 (considering each sampling station of a given reservoir and comparing it with the reservoir's  
212 reference site). To control for spatio-temporal dependence, we used a random factor where  
213 sampling stations were nested within reservoirs:  $\sim 1 + \text{TSI} | \text{STATION/RES}$  (where RES stands  
214 for reservoir identity). We also used an autoregressive correlation structure (corAR1) to control  
215 for temporal autocorrelation in our glmms. We determined the autoregressive process in each

216 time series by plotting each time series and by observing the autocorrelation function (ACF) and  
217 the partial autocorrelation function (PACF) on detrended data using an ARIMA (autoregressive  
218 integrated moving average model) diagnostic (astsa package v. 1.3 in R; Stoffer 2014). For each  
219 time series, errors were specified to follow an autoregressive process of degree 1 (*i.e.*, the  
220 autocorrelation is highest between sequential years). Our glmms models with autocorrelated  
221 structure did not perform better than those without based on AICc scores (Burnham and  
222 Anderson 2002) and so we present below only the glmms without the autocorrelated structure.

### 223 ***Beta-diversity analysis***

224 To test the extent to which fish assemblages for a given “station-time” combination was  
225 unique compared to the other ones (*i.e.*, species turnover rate), we computed LCBD indices  
226 (Local Contributions to Beta Diversity; Legendre and De Cáceres 2013). LCBD values indicate  
227 how unique is any fish composition observation relative to other comparable data by assessing its  
228 contribution to the total variation in fish composition in space and/or time (Legendre and De  
229 Cáceres 2013, Legendre and Gauthier 2014). To assess the total variation in fish composition, we  
230 first computed the total sum of squares ( $SS_{total}$ ) of the matrix of square-rooted dissimilarities by  
231 summing the dissimilarities in the lower triangular matrix and dividing by the number of  
232 observations,  $N$ . We then computed total beta diversity ( $BD_{Total}$ ) by dividing  $SS_{total}$  by  $N-1$   
233 (Legendre and De Cáceres 2013, Legendre and Gauthier 2014). We measured LCBDs directly  
234 from the dissimilarity matrix of all observations as the diagonal elements of the matrix  
235 containing the centered dissimilarities, divided by  $SS_{total}$  (Legendre and De Cáceres 2013,  
236 Legendre and Gauthier 2014). We computer LCBD at the complex level, evaluating the  
237 uniqueness of all possible combinations station-time (including and excluding reference sites), at  
238 the reservoir level (including and excluding reference sites) and at the sampling station level. At

239 the sampling station level, each station was evaluated separately, so the turnover rate was in  
240 relation to time only.

241 To assess individual species' influences on beta diversity, we computed 'Species  
242 Contributions to Beta Diversity' (SCBD indices) using a Hellinger distance measure (Legendre  
243 and De Cáceres, 2013). SCBD allowed us to identify species that were important contributors to  
244 spatial or/and temporal beta diversity. LCBD and SCBD indices were calculated using the  
245 *beta.div* function (available at <http://adn.biol.umontreal.ca/~numericaecology/FonctionsR/>).  
246 SCBD were also computed for each scale (complex, reservoir and sampling station).

### 247 ***RDA and variation partitioning***

248 The role of temporal, spatial, environmental and sampling variability as possible  
249 predictors of fish species assemblages was investigated with redundancy analysis (RDA; vegan  
250 R package v. 2.4-1; Oksanen *et al.* 2016). Specifically, time since impoundment [TSI], was  
251 measured as years before or after impoundment, whereas spatial heterogeneity [SH] among  
252 sampling stations or reservoirs was measured using the latitude and longitude of each sampling  
253 station. Environmental variability among sites was measured using the following water quality  
254 variables [WQV]: transparency, dissolved oxygen, pH, conductivity, temperature. Finally,  
255 differences in fishing gear [G] among sampling stations or between years were also considered.  
256 RDA is an extension of multiple regression for the analysis of multivariate response data and is  
257 used to quantify the degree to which different predictors explain variation in the community data  
258 (Borcard *et al.* 2011). We used the Hellinger-transformed abundance values of species as  
259 response variables. To produce the most parsimonious model, we performed forward selection  
260 using the double stopping criteria (*ordiR2step* function in the vegan R package v. 2.4-1), in  
261 which new variables added to the model had to achieve a 0.05  $\alpha$  level and the cumulative

262 adjusted  $R^2$  of the variable set could not exceed the adjusted  $R^2$  of the full model (Blanchet et al.  
263 2008). Because of a small sample size, these analyses were not possible in the SM complex.

264 We examined fish assemblages in LG complex using RDA at the three scales. Because of  
265 multicollinearity among variables when using TSI and WQV simultaneously in the RDA, we ran  
266 two separate sets of RDAs to understand the patterns and variation explained by both TSI and  
267 WQV. Two RDAs were produced at the LG complex level (one including time since  
268 impoundment and one including water quality variables), six RDAs at the reservoir level, and 46  
269 at the sampling stations level.

270 We also conducted unbiased variation partitioning based on RDAs and adjusted  $R^2$   
271 (Peres-Neto et al. 2006) using the varpart function in the vegan package v. 2.4-1. We used the  
272 forward selection procedure of Blanchet et al. (2008). The overall variation in species  
273 assemblages can be divided into “fractions” attributable to different data matrices as well as  
274 combinations of these explanatory matrices (*i.e.*, shared variation). Here, we use our four  
275 matrices: time since impoundment [TSI], spatial heterogeneity [SH], water quality variables  
276 [WQV] and fishing gear [G]. The total variation of species assemblages was decomposed into 15  
277 fractions at the complex and reservoir levels and eight at the sampling station levels because the  
278 [SH] matrix is irrelevant at the sampling station level.

## 279 **Results**

### 280 **Little change in fish diversity in response to impoundment over 20 years**

281 Overall, directional trends in extrapolated richness, diversity, or evenness during the first  
282 20 years (in LG) or 10 years (in SM) following impoundment were weak, as in most cases the

283 95% confidence intervals for slope estimates overlapped with zero (Fig. 2, Table 2). Across all  
284 scales (*i.e.*, complex, reservoir and sampling stations), and categories of impacted stations (U, D,  
285 UR and UL), we did not detect significant differences in the diversity trends from impacted  
286 stations compared to those observed from reference sites (Fig. 2, Tables 2-3, and Appendix S1:  
287 Tables S1-S4). Likewise, temporal trends in extrapolated richness, diversity and evenness did not  
288 differ across reservoirs (Table 3, Appendix S1: Tables S1-S4). Opinaca reservoir had an overall  
289 higher richness and Saint-Marguerite 3 had an overall lower richness than Robert-Bourassa and  
290 Caniapiscau reservoirs (Table 1).

291 For completeness, we also examined the temporal trends among the categories of  
292 impacted stations to probe for variability. To do this, we excluded reference sites from the  
293 analysis and examined the additive effects of TSI and categories of impacted stations instead of  
294 their interaction. At the complex level, we did not detect a difference in trends for extrapolated  
295 richness, diversity and evenness when impacted stations categories were combined (*i.e.*, only the  
296 effect of TSI in the model; Appendix S1: Table S5). When station categories were added in the  
297 model (categorized according to their position relative to the dam and original habitat type; D vs.  
298 U or D, vs UR and UL), richness decreased significantly over time (Appendix S1: Table S5).  
299 This trend was strongly driven by the unusually low richness values observed in 2000 in Robert-  
300 Bourassa (which had lower fishing effort in this one year). When this data point was excluded  
301 from the analysis, the trend in richness was not significant anymore. No significant temporal  
302 trends were detected for diversity and evenness (Appendix S1: Table S5). Downstream stations  
303 had consistently higher extrapolated richness than upstream stations, but did not differ in  
304 diversity and evenness (Appendix S1: Table S5). At the reservoir level, we detected a significant  
305 decreasing trend in diversity for the Robert-Bourassa reservoir across all categories of impacted

306 stations (Appendix S1: Table S6), but no significant trend in extrapolated richness, diversity and  
307 evenness in Opinaca, Caniapiscou and Sainte-Marguerite (Appendix S1: Table S6). At the  
308 reservoir level, we did not detect a consistent difference between downstream and upstream  
309 stations for the three metrics, and across reservoirs (Appendix S1: Table S6).

310         The absence of a clear directional trend in contemporary diversity metrics was also  
311 mirrored in the  $\beta$ -diversity results, which did not show clear patterns across space and time at  
312 either the complexes (Fig. 3a, Appendix S2: Fig. S1) or reservoirs levels (Appendix S2: Fig. S2).  
313 At these two levels, very few Local Contribution to Beta-Diversity (LCBD) values were  
314 significant, and the highest LCBD values did not seem to relate to impoundment. Overall,  
315 reference sites had LCBD values comparable to impacted stations (Fig. 3a and Appendix S2).  
316 When  $\beta$ -diversity analyses were conducted at the sampling station level (*i.e.*, only comparing any  
317 one site to itself through time), we found that some of the highest LCBD values were apparent in  
318 upstream stations (and significant in some cases) during and shortly after filling, (Fig. 3b) which  
319 shows a higher species turnover rate during this period at this scale.

### 320 **Change in species assemblages following impoundment**

321         At the complex and reservoirs scales, the spatial heterogeneity associated with the  
322 sampling stations was the main driver structuring fish assemblages, and masked the effect of  
323 impoundment (Fig. 4 a-b, Appendix S3: Figs. S1-S2). The effect of impoundment (measured as  
324 time since impoundment; TSI) only became a dominant predictor at the scale of the sampling  
325 station (Fig. 4c, Appendix S3: Figs. S3, Appendix S4: Tables S1-S2). Fishing gear explained  
326 only a small independent fraction of the variation at all scales (Fig. 4).

327           At the scale of the LG complex, fish assemblages were structured spatially (SH), and to a  
328 lesser extent by water quality variables (WQV) and time since impoundment (Fig. 4a and  
329 Appendix S3: Fig. S1). Spatial heterogeneity explained 45% of the variation across all shared  
330 fractions (25% explained by SH alone). Most of the variation shared with SH overlapped with  
331 WQV (a total of 15%; Fig. 4a). This was corroborated by the RDAs, where SH explained 44% of  
332 the variation (Appendix S3: Fig. S1a; 42% if we excluded reference sites) and TSI explained an  
333 additional 4% (Appendix S3: Fig. S1a; 6% if we excluded reference sites). When we used WQV  
334 instead of TSI in the RDA, SH still explained 45% of the variation (43% excluding reference  
335 sites), and WQV explained less than 3% of additional variation (Appendix S3: Fig. S1b).

336           A similar pattern was observed at the scale of reservoirs (Fig. 4b and Appendix S3: Fig.  
337 S2). From the variation partitioning analyses, SH explained the highest proportion of the  
338 variation across reservoirs (mean total variation of 37%; Appendix S4: Table S1). From this, 2%  
339 was shared with TSI and 21% with WQV (Fig. 4b and Appendix S4: Table S1). In RDAs, SH  
340 also explained most of the variation in species assemblages with an average value of 30%  
341 including or excluding reference sites (RB = 30%; OP = 36%; CA = 23%; Appendix S3: Fig. S2  
342 a, c, e). TSI explained on average an additional 6% of the variation (RB = 7%, OP = 3%, CA =  
343 7%; Appendix S3: Fig. S2 a, c, e), and this value increased to 11% if we excluded reference sites  
344 (RB = 13%, OP = 76%, CA = 14%). When using WQV in the RDAs, variables explained less  
345 than 5% of the variation, including or excluding reference sites (Appendix S3: Fig. S2 b, d, f).

346           At the scale of the sampling stations, most of the variation in fish assemblages was  
347 explained by the shared effect of TSI and WQV (variation partitioning; Fig. 4c and Appendix S4:  
348 Table S2). This suggests that fish responded in a large extent to changes in water quality  
349 experienced during and after impoundment. In RDAs, TSI was also the main driver structuring



350 fish community (Fig. 4c, Appendix S4: Table S2), and the assemblages followed a consistent  
351 trajectory over time in most impacted stations (see examples in Appendix S3: Fig. S3). In RDAs,  
352 when using WQV, variables explained a similar, but always a lower proportion of the variation  
353 than TSI (average for all impacted stations; TSI = 22%, WQ = 15%).

#### 354 **Species affected by impoundment**

355 The effect of impoundment on species differed between upstream and downstream  
356 stations, and among reservoirs (Fig. 5 and Appendix S5). In several upstream stations, we  
357 observed a predominant pattern where the assemblage went from a catostomids-dominated  
358 community (longnose sucker, *Catostomus catostomus* and white sucker, *C. commersonii*) toward  
359 a pike-coregonid (northern pike, *Esox lucius*, whitefish *Coregonus clupeaformis* and cisco, *C.*  
360 *artedi*) dominated community after impoundment (Appendix S3: Fig. S3). This pattern was not  
361 observed in reference sites nor in downstream stations (Appendix S3: Fig. S3). Changes in  
362 species assemblages in upstream stations seems to have occurred within the first 5-6 years of  
363 impoundment (Appendix S3: Fig. S3).

364 Species contribution to beta-diversity (SCBD) calculated at the sampling station level  
365 (which is the turnover rate of individual species across time; Fig. 5) corroborated RDAs at the  
366 sampling station level (Appendix S3: Fig. S3). Robert-Bourassa and Opinaca reservoirs  
367 experienced very similar assemblage changes in upstream stations but differed for downstream  
368 and reference sites. In upstream stations of those two reservoirs, the white sucker (decrease), the  
369 walleye (*Sander vitreus*, decrease), the whitefish (increase) and the northern pike (increase) were  
370 the species with the higher turnover rate (Fig. 5a, b). In Robert-Bourassa, the turnover rate was  
371 subtler in the downstream station (Fig. 5b), and the walleye (decreased) and the burbot (*Lota*

372 *lota*, increased) demonstrated high turnover rate in the reference site (Fig. 5a). In Opinaca, the  
373 lake sturgeon (*Acipenser fulvescens*) generally decreased in downstream stations and there was  
374 no clear change in species turnover rate in the reference site (Fig. 5b). In Caniapiscau, we  
375 observed an increase in whitefish in most upstream stations, an increase in lake trout (*Salvelinus*  
376 *namaycush*) in upstream and downstream stations and a decrease in suckers and northern pike in  
377 upstream stations and downstream stations (Fig. 5c). In Sainte-Marguerite, the two suckers  
378 species experienced high turnover rates in upstream stations (Fig. 5d). Whitefish increased in  
379 abundance in both upstream and reference sites whereas pike declined in downstream sites (Fig.  
380 5d).

## 381 **Discussion**

382 Equipped with fish assemblage data that were collected over a long period and across a  
383 large spatial network from a boreal remote area, this study is unique in its ability to isolate the  
384 effect of impoundment and flow regulation from other factors that often co-occur with  
385 hydroelectricity projects. Using contemporary diversity metrics, our analyses showed that there  
386 were few clear directional patterns in fish richness and diversity following impoundment.  
387 However, we did detect changes in fish assemblages that are associated with impoundment at the  
388 sampling stations scale. Fish assemblage shifts were largely masked when analyses were  
389 conducted at the larger scales, highlighting the importance of a multi-scale approach to evaluate  
390 the anthropogenic impacts on ecosystems. Interestingly, published studies on the impact of  
391 hydroelectricity on boreal fishes are rare compared to temperate and tropical ones. Thus, this  
392 study adds to the global evaluation of the effects of hydroelectricity production on fish.

## 393 **Heterogeneity in fish community responses to impoundment**

394        Given that there has been a range of fish community responses to impoundment described in  
395 the literature – as highlighted in the introduction – we are at a point where we need to explore  
396 why there is heterogeneity, and where the heterogeneity lies within and among studies. The use  
397 of ecological filters could help to think about this mechanistically and critically. To succeed in  
398 the presence of the different ecological filters brought about by hydroelectricity production, fish  
399 species must possess appropriate life history traits, evolutionary strategies or adaptations.

400        The first filter is associated with river fragmentation and barrier to movement. Dams can  
401 block migratory route of diadromous species (*i.e.*, fish that spend part of their lives in freshwater  
402 and part in saltwater; Limburg and Waldman 2009), can alter seasonal instream migration of  
403 potamodromous ones (*i.e.*, fish that migrates within freshwater bodies), and can limit ontogenetic  
404 movements of some species. Many studies attributed local fish species losses to river  
405 fragmentation and damming in tropical settings (Okada et al. 2005, Sá-Oliveira et al. 2015,  
406 Pelicice et al. 2015, Lima et al. 2016), in temperate regions dominated by large rivers system  
407 (Reyes-Gavilán et al. 1996, Gehrke et al. 2002) and in prairie streams (Galat et al. 1998).  
408 However, the presence of dams in our systems were likely not a dominant filter as in other areas  
409 because here native fishes are not diadromous (Appendix S6) and because many of the focal  
410 dams were built on obstacles that were already impassable for fish (*i.e.*, high waterfall).

411        The second filter is related to the effects of river regulation and modification of the  
412 hydrological regime on fish habitat quality. The newly-created lentic ecosystem upstream of the  
413 dam represents a radical transformation to fish habitats, and can exert a suite of selective  
414 pressures not experienced by fish during their evolutionary history. In tropical regions, fish  
415 community have evolved predominantly in flowing waters and linear systems (Gomes and  
416 Miranda 2001). Not surprisingly, many studies in tropical regions found a significant lost in

417 richness or diversity following impoundment (Martinez et al. 1994, de Mérona 2002, de Mérona  
418 et al. 2005, Sá-Oliveira et al. 2015 p., Lima et al. 2016). Many fish species are extirpated from  
419 tropical reservoirs because they lack morphological, behavioral characteristics, reproductive  
420 strategy and plasticity to successfully occupy these new habitats (Gomes and Miranda 2001,  
421 Agostinho et al. 2008, Lima et al. 2016). In non-tropical regions, different effects have been  
422 reported and appear to depend in part of the focal habitat under consideration (upstream or  
423 downstream of the dam) and the water management of the site. For example, the slow increase in  
424 water levels and new lentic conditions favored opportunistic and detritivore species in a Spanish  
425 reservoir (Rodriguez Ruiz 1998). However, high drawdown reservoirs in Finland have less  
426 benthivorous fish species (Sutela and Vehanen 2008). Downstream of dams in the U.S., Mims  
427 and Olden (2013) found that equilibrium species (*i.e.*, a group of fish that do well in a more  
428 stable, predictable environments) were favored at the detriment of opportunistic species. Species  
429 responses downstream of a dam may also be dependent of flow regimes. For example, a decline  
430 in discharge strongly affected changes in fish assemblages in the Canadian River (USA),  
431 especially during the spawning season (Bonner and Wilde 2000). Relative to tropical systems,  
432 boreal fish assemblages have a larger breadth of life-history trait strategies (Erős et al. 2012) and  
433 are well adapted to both river and lake environments. This may partly explain why we did not  
434 observe significant losses in richness or diversity in our system relative to reference ecosystems,  
435 but rather a change in species assemblages. Walleye relative abundance decreased in some  
436 stations but this species is at the limits of its northern distribution in LG and the general decrease  
437 in summer water temperatures following impoundment might have affected its abundance  
438 (Therrien et al. 2002). The rapid decrease in white suckers might also be the result of a  
439 redistribution of the population to seek warmer temperatures (Doyon and Belzile 1998). Overall,

440 an average of 72% of the variation was unexplained regarding species assemblage from RDAs  
441 and variation partitioning analyses at the sampling station level (see Fig. 4). This unexplained  
442 variation may be related to rapid loss or gain of adequate spawning ground and preferred habitat  
443 for some species resulting from a lotic to a lentic regime and to the strength of trophic  
444 interactions among species that were building over time.

445 The third filter is related to the replacement of extirpated native species by non-native species  
446 and changes in trophic interactions in the food web (Taylor et al. 2001, Clavero and Hermoso  
447 2010, Liew et al. 2016). This filter can explain the absence of a directional trend in richness or  
448 diversity, and even an increase in richness in some studies. The introduction of non-native and  
449 invasive species in reservoirs (*i.e.*, high propagule pressure in reservoirs; Havel et al. 2005) can  
450 promote a shift from native-dominated fish communities to invasive-dominated ones because the  
451 establishment of non-native fishes has been facilitated by the new lentic habitats created  
452 upstream of the dam, by the damped variability in streamflow downstream of the dam and, in  
453 certain regions, by the low biotic resistance of the evolving fish community (Rodriguez Ruiz  
454 1998, Johnson et al. 2008, Clavero and Hermoso 2010). Ichthyological regions and river basins  
455 where endemic species are abundant might be particularly vulnerable (Dudgeon et al. 2006,  
456 Lévêque et al. 2008). In some extreme cases, the introduction of a voracious non-native predator  
457 (peacock-bass; *Cichla kelberi*) in Rosana reservoir (Paraná river basin), decreased fish richness  
458 by 80% after three years, and caused the elimination of small-sized species (Pelicice and  
459 Agostinho 2008). The creation of lentic habitats often increases the densities of piscivorous  
460 fishes (Taylor et al. 2001, Gido et al. 2009, Franssen and Tobler 2013) which can be detrimental  
461 for prey populations. In our system, no invasive or non-native species has been observed, and no

462 endemic species are present in the LG and SM complexes. However, the increase in northern  
463 pike in many stations might be the result of predation on suckers.

464         The time needed to detect a significant change in fish assemblages will depend on the  
465 dominant mechanisms affecting the stability of the food web in reservoirs, and on the temporal  
466 resolution of the dataset. If the dominant mechanisms responsible for changes in fish  
467 assemblages are related to reproduction and recruitment through the strength of year classes, the  
468 effect may take many years to be detectable. Species with some specific life history traits (*e.g.*,  
469 late age at first reproduction), or positioned at higher trophic levels may have delayed response  
470 to impoundment. If the dominant mechanisms affecting fish community are through adult fish  
471 movement and redistribution due to river fragmentation and change in habitat quality, the change  
472 can be detectable quickly. Time needed to detect a change in fish community is highly variable  
473 among studies, as it has been reported to be either quick (*i.e.*, within 5 years after impoundment  
474 (Martinez et al. 1994)) or more subtle and thus requiring data that span 30 years after  
475 impoundment (Quinn and Kwak 2003). In our study, the assemblages changed quickly and seem  
476 to have reach an equilibrium after 5-6 years. This suggest that movement and habitat selection  
477 might be driving some processes responsible for change fish assemblages in boreal reservoirs.  
478 Some community states or phases (*i.e.*, dominant species in the community) can also be  
479 transient. For instance, Kubečka (1993) and Říha et al. (2009) documented a five-phase  
480 succession in fish species with European reservoirs aging. Fish assemblage changed successively  
481 from a riverine species phase (before impoundment and shortly after), to a pike phase (*Esox*  
482 *lucius*), followed by a perch phase (*Perca fluviatilis*), and then a rapid and transient perch-  
483 cyprinid phase, to a final and highly stable cyprinid dominated phase. Our ability to detect  
484 change in assemblages will also depend on the sampling strategy and resolution (ever year vs.

485 every 5 years), where some subtle changes can be missed or not captured if the time between  
486 sampling events is long.

### 487 **Importance of using a multi-scale approach**

488 In long-term studies, it may be difficult to separate the effects of impoundment from  
489 effects due to change in land use and climate change on fish community. However, with careful  
490 planning and financial investment into a sound sampling design (considering what to measure  
491 and where, at which scale and for how long) one can elucidate underlying biological processes  
492 and mechanisms. Earlier ecological works have shown that great insights are achieved when  
493 multiple spatial and temporal scales are considered because patterns observed in communities at  
494 a given scale are often the consequence of a complex interplay between various processes  
495 occurring at multiple scales (Wiens 1989, Whittaker et al. 2001, Mander et al. 2005, Dray et al.  
496 2012). Accordingly, changes in species assemblages can result from richness difference or  
497 “nestedness” (one community may include a larger number of species than another) or from  
498 species replacement or species turnover (species tend to replace each other along ecological  
499 gradients; Baselga 2010, Carvalho et al. 2012). In this study, change in fish assemblages in  
500 response to impoundment (*i.e.*, species replacement) were only detectable at the sampling station  
501 scale. At the complex and reservoirs scales, we captured richness difference where the variation  
502 in species assemblages was likely due to species thinning and other large scale ecological  
503 processes.

504 Certainly scale matters, but having different types of stations (upstream and downstream),  
505 reference sites, and time series covering before and after impoundment periods are equally  
506 important considerations. The impacts of impoundment and river regulation on fish were

507 different in upstream (from a lotic to lentic habitat, barrier to migration) and downstream stations  
508 (reduced flow and water level fluctuations). We found an overall higher species richness in  
509 downstream stations, a tendency (but not a significant trend) for a stronger impact in upstream  
510 stations that were rivers before being reservoir sites, and a relatively consistent pattern in  
511 upstream stations over time whereby the community shifted from one dominated by catostomids  
512 to a pike and coregonids dominated systems. For this reason, data must be collected on both  
513 types of stations to get a complete story. Because the impacts of river impoundment and  
514 regulation on upstream and downstream stations are different, “space for time substitution”  
515 designs (where downstream stations are used as an index of the fish community that were found  
516 before impoundment) are not ideal and should be avoided. Furthermore, seasonal and punctual  
517 climatic events (*e.g.*, strong summer storm, cold or very dry year) that are unrelated to the  
518 hydroelectricity project can misrepresent the long-term average. As such, fish assemblage data  
519 collected over a long period (> 5 years) need to be collected in reference sites as well.  
520 Comparing reservoirs to only reference lakes or only rivers might be inadequate to evaluate how  
521 fish communities differ across sites because reservoirs are neither a lake nor a river. Irz et al.  
522 (2006) compared reservoir fish communities with those in rivers and lakes and found that  
523 reservoir communities are more similar to lake communities than river communities, but this is  
524 only one study. Finally, time series should cover the period before and after impoundment,  
525 preferably lasting long enough to cover the non-equilibrium trophic surge and reach the new  
526 ecosystem equilibrium (Grimard and Jones 1982, Turgeon et al. 2016).

## 527 **General conclusions and recommendations**

528 In this study, using a network of sites located in a remote boreal ecosystem with minimal  
529 confounding pressures, we provided strong empirical evidence that the creation of large



530 hydroelectric complexes did not result in a loss of fish species nor change in diversity, but  
531 resulted in a shift in fish assemblages. Both large lakes and large rivers are common in Canadian  
532 boreal regions (Messenger et al. 2016), and might explain why the evolutionary young fish species  
533 found in this region are especially well adapted and resilient to river impoundment. Reservoirs  
534 created for hydroelectricity production are now dominant features of the landscape, and they will  
535 become even more dominant in the coming years, especially in tropical regions (Zarfl et al. 2014,  
536 Grill et al. 2015, Winemiller et al. 2016). Identifying which ecological filters related to  
537 impoundment and river flow regulation affect species, evaluating the strength of their effects,  
538 and how they vary across regions might help us to assist in implementing mitigation measures to  
539 minimize biodiversity loss and even revert the loss of some species, if species are only locally  
540 lost. Our work also highlights that contemporary diversity and richness indices are not sensitive  
541 enough to detect species replacement, which was common in the impounded rivers considered.  
542 Instead, metrics that consider changes in fish community assemblages at a fine scale (like our  
543 study), as well as those that evaluate the status of native populations, particularly for rare and  
544 endemic species are more appropriate. Given the strength of our multi-scale approach in  
545 providing a complete perspective on the scale at which river impoundment affect fish  
546 community, we caution against large scale extrapolations and correlation studies that may  
547 underestimate or mask the anthropogenic effects on aquatic ecosystems.

## 548 **Acknowledgments**

549 This work was supported by a MITACS Elevate scholarship to KT with Hydro-Québec  
550 as an industrial partner. IG-E also acknowledges support from the Canada Research Chairs  
551 program. We thank J. Caumartin (Hydro-Québec), R. Dion (Hydro-Québec), P. Johnston

552 (Hydro-Québec) and Chris Solomon (Cary Institute, NY) for helpful suggestions and comments  
553 on this manuscript.

## 554 **Literature Cited**

- 555 Affonso, I. de P., L. C. Gomes, A. A. Agostinho, H. J. Message, J. D. Latini, and E. García-  
556 Berthou. 2015. Interacting effects of spatial gradients and fishing gears on characterization of  
557 fish assemblages in large reservoirs. *Reviews in Fish Biology and Fisheries*:1–11.
- 558 Agostinho, A. A., F. M. Pelicice, and L. C. Gomes. 2008. Dams and the fish fauna of the  
559 Neotropical region: impacts and management related to diversity and fisheries. *Brazilian*  
560 *Journal of Biology* 68:1119–1132.
- 561 Baselga, A. 2010. Partitioning the turnover and nestedness components of beta diversity. *Global*  
562 *Ecology and Biogeography* 19:134–143.
- 563 Blanchet, F. G., P. Legendre, and D. Borcard. 2008. Forward selection of explanatory variables.  
564 *Ecology* 89:2623–2632.
- 565 Bonner, T. H., and G. R. Wilde. 2000. Changes in the Canadian River Fish Assemblage  
566 Associated with Reservoir Construction. *Journal of Freshwater Ecology* 15:189–198.
- 567 Borcard, D., F. Gillet, and P. Legendre. 2011. Canonical Ordination. Pages 153–225 *Numerical*  
568 *Ecology with R*. Springer New York.
- 569 Brose, U., N. D. Martinez, and R. J. Williams. 2003. Estimating Species Richness: Sensitivity to  
570 Sample Coverage and Insensitivity to Spatial Patterns. *Ecology* 84:2364–2377.
- 571 Burnham, K. P., and D. R. Anderson. 2002. Model selection and multimodel inference: A  
572 practical information-theoretic approach. Second edition. Springer-Verlag, New York.

- 573 Carvalho, J. C., P. Cardoso, and P. Gomes. 2012. Determining the relative roles of species  
574 replacement and species richness differences in generating beta-diversity patterns. *Global*  
575 *Ecology and Biogeography* 21:760–771.
- 576 Clavero, M., and V. Hermoso. 2010. Reservoirs promote the taxonomic homogenization of fish  
577 communities within river basins. *Biodiversity and Conservation* 20:41–57.
- 578 Cumming, G. S. 2004. The impact of low-head dams on fish species richness in wisconsin, usa.  
579 *Ecological Applications* 14:1495–1506.
- 580 Cushman, R. M. 1985. Review of Ecological Effects of Rapidly Varying Flows Downstream  
581 from Hydroelectric Facilities. *North American Journal of Fisheries Management* 5:330–339.
- 582 Deslandes, J.-C., and R. Fortin. 1994. Optimisation du réseau de suivi environnemental des  
583 populations de poissons des milieux affectés par l'aménagement du complexe La Grande  
584 (Phase I).
- 585 Doyon, J.-F., and L. Belzile. 1998. Réseau de suivi environnemental du complexe La Grande  
586 (1977-1996). Suivi des communautés de poissons et étude spéciale sur le doré (secteur ouest  
587 du territoire). Page 145 p. + annexes.
- 588 Dray, S., R. Péliissier, P. Couteron, M.-J. Fortin, P. Legendre, P. R. Peres-Neto, E. Bellier, R.  
589 Bivand, F. G. Blanchet, M. De Cáceres, A.-B. Dufour, E. Heegaard, T. Jombart, F. Munoz, J.  
590 Oksanen, J. Thioulouse, and H. H. Wagner. 2012. Community ecology in the age of  
591 multivariate multiscale spatial analysis. *Ecological Monographs* 82:257–275.
- 592 Dudgeon, D., A. H. Arthington, M. O. Gessner, Z.-I. Kawabata, D. J. Knowler, C. Lévêque, R. J.  
593 Naiman, A.-H. Prieur-Richard, D. Soto, M. L. J. Stiassny, and C. A. Sullivan. 2006.  
594 Freshwater biodiversity: importance, threats, status and conservation challenges. *Biological*  
595 *Reviews* 81:163–182.

- 596 Erős, T., J. D. Olden, R. S. Schick, D. Schmera, and M.-J. Fortin. 2012. Characterizing  
597 connectivity relationships in freshwaters using patch-based graphs. *Landscape Ecology*  
598 27:303–317.
- 599 Franssen, N. R., and M. Tobler. 2013. Upstream effects of a reservoir on fish assemblages  
600 45 years following impoundment. *Journal of Fish Biology* 82:1659–1670.
- 601 Fréchette, J.-L. 1980. Réseau surveillance écologique. Vol. 1. Société d'énergie de la Baie  
602 James. Environnement.
- 603 Friedl, G., and A. Wüest. 2002. Disrupting biogeochemical cycles - Consequences of damming.  
604 *Aquatic Sciences* 64:55–65.
- 605 Friedman, W. R. Osterkamp, M. L. Scott, and G. T. Auble. 1998. Downstream effects of dams  
606 on channel geometry and bottomland vegetation: Regional patterns in the great plains.  
607 *Wetlands* 18:619–633.
- 608 Furey, P. C., R. N. Nordin, and A. Mazumder. 2006. Littoral benthic macroinvertebrates under  
609 contrasting drawdown in a reservoir and a natural lake. *Journal of the North American*  
610 *Benthological Society* 25:19–31.
- 611 Galat, D. L., L. H. Fredrickson, D. D. Humburg, K. J. Bataille, J. R. Bodie, J. Dohrenwend, G. T.  
612 Gelwicks, J. E. Havel, D. L. Helmers, J. B. Hooker, J. R. Jones, M. F. Knowlton, J. Kubisiak,  
613 J. Mazourek, A. C. McColpin, R. B. Renken, and R. D. Semlitsch. 1998. Flooding to Restore  
614 Connectivity of Regulated, Large-River Wetlands. *BioScience* 48:721–733.
- 615 Gehrke, P. C., D. M. Gilligan, and M. Barwick. 2002. Changes in fish communities of the  
616 Shoalhaven River 20 years after construction of Tallowa Dam, Australia. *River Research and*  
617 *Applications* 18:265–286.

- 618 Gido, K. B., J. F. Schaefer, and J. A. Falke. 2009. Convergence of fish communities from the  
619 littoral zone of reservoirs. *Freshwater Biology* 54:1163–1177.
- 620 Gomes, L. c., and L. e. Miranda. 2001. Riverine characteristics dictate composition of fish  
621 assemblages and limit fisheries in reservoirs of the upper Paraná River basin. *Regulated  
622 Rivers: Research & Management* 17:67–76.
- 623 Graf, W. L. 2006. Downstream hydrologic and geomorphic effects of large dams on American  
624 rivers. *Geomorphology* 79:336–360.
- 625 Grill, G., B. Lehner, A. E. Lumsdon, G. K. MacDonald, C. Zarfl, and C. R. Liermann. 2015. An  
626 index-based framework for assessing patterns and trends in river fragmentation and flow  
627 regulation by global dams at multiple scales. *Environmental Research Letters* 10:015001.
- 628 Grimard, Y., and H. G. Jones. 1982. Trophic Upsurge in New Reservoirs: A Model for Total  
629 Phosphorus Concentrations. *Canadian Journal of Fisheries and Aquatic Sciences* 39:1473–  
630 1483.
- 631 Guenther, C. B., and A. Spacie. 2006. Changes in Fish Assemblage Structure Upstream of  
632 Impoundments within the Upper Wabash River Basin, Indiana. *Transactions of the American  
633 Fisheries Society* 135:570–583.
- 634 Havel, J. E., C. E. Lee, and J. M. V. Zanden. 2005. Do Reservoirs Facilitate Invasions into  
635 Landscapes? *BioScience* 55:518–525.
- 636 Haxton, T. J., and C. S. Findlay. 2009. Variation in large-bodied fish-community structure and  
637 abundance in relation to water-management regime in a large regulated river. *Journal of Fish  
638 Biology* 74:2216–2238.

- 639 Irz, P., M. Odion, C. Argillier, and D. Pont. 2006. Comparison between the fish communities of  
640 lakes, reservoirs and rivers: can natural systems help define the ecological potential of  
641 reservoirs? *Aquatic Sciences* 68:109–116.
- 642 Johnson, P. T., J. D. Olden, and M. J. Vander Zanden. 2008. Dam invaders: impoundments  
643 facilitate biological invasions into freshwaters. *Frontiers in Ecology and the Environment*  
644 6:357–363.
- 645 Kroger, R. L. 1973. Biological Effects of Fluctuating Water Levels in the Snake River, Grand  
646 Teton National Park, Wyoming. *American Midland Naturalist* 89:478–481.
- 647 Kruk, A., and T. Penczak. 2003. Impoundment impact on populations of facultative riverine fish.  
648 *Annales de Limnologie - International Journal of Limnology* 39:197–210.
- 649 Kubečka, J. 1993. Succession of fish communities in reservoirs of Central and Eastern Europe.  
650 Pages 153–168 *in* M. Straškraba, J. G. Tundisi, and A. Duncan, editors. *Comparative*  
651 *Reservoir Limnology and Water Quality Management*. Springer Netherlands.
- 652 Legendre, P., and M. De Cáceres. 2013. Beta diversity as the variance of community data:  
653 dissimilarity coefficients and partitioning. *Ecology Letters* 16:951–963.
- 654 Legendre, P., and O. Gauthier. 2014. Statistical methods for temporal and space–time analysis of  
655 community composition data. *Proceedings of the Royal Society of London B: Biological*  
656 *Sciences* 281:20132728.
- 657 Lévêque, C., T. Oberdorff, D. Paugy, M. L. J. Stiassny, and P. A. Tedesco. 2008. Global  
658 diversity of fish (Pisces) in freshwater. *Hydrobiologia* 595:545–567.
- 659 Liermann, C. R., C. Nilsson, J. Robertson, and R. Y. Ng. 2012. Implications of Dam Obstruction  
660 for Global Freshwater Fish Diversity. *BioScience* 62:539–548.

- 661 Liew, J. H., H. H. Tan, and D. C. J. Yeo. 2016. Dammed rivers: impoundments facilitate fish  
662 invasions. *Freshwater Biology* 61:1421–1429.
- 663 Lima, A. C., C. S. Agostinho, D. Sayanda, F. M. Pelicice, A. M. V. M. Soares, and K. A.  
664 Monaghan. 2016. The rise and fall of fish diversity in a neotropical river after impoundment.  
665 *Hydrobiologia* 763:207–221.
- 666 Limburg, K. E., and J. R. Waldman. 2009. Dramatic Declines in North Atlantic Diadromous  
667 Fishes. *BioScience* 59:955–965.
- 668 Mander, Ü., F. Müller, and T. Wrba. 2005. Functional and structural landscape indicators:  
669 Upscaling and downscaling problems. *Ecological Indicators* 5:267–272.
- 670 Martinez, P. J., T. E. Chart, M. A. Trammell, J. G. Wullschleger, and E. P. Bergersen. 1994. Fish  
671 species composition before and after construction of a main stem reservoir on the White  
672 River, Colorado. *Environmental Biology of Fishes* 40:227–239.
- 673 de Mérona, B. 2002. Dynamique des peuplements de poissons dans le réservoir de Petit-Saut  
674 (Fleuve Sinnamary, Guyane Française). *Bulletin Français de la Pêche et de la Pisciculture*:5–  
675 22.
- 676 de Mérona, B. de, R. Vigouroux, and F. L. Tejerina-Garro. 2005. Alteration of Fish Diversity  
677 Downstream from Petit-Saut Dam in French Guiana. Implication of Ecological Strategies of  
678 Fish Species. *Hydrobiologia* 551:33–47.
- 679 Messenger, M. L., B. Lehner, G. Grill, I. Nedeva, and O. Schmitt. 2016. Estimating the volume  
680 and age of water stored in global lakes using a geo-statistical approach. *Nature*  
681 *Communications* 7:13603.
- 682 Mims, M. C., and J. D. Olden. 2013. Fish assemblages respond to altered flow regimes via  
683 ecological filtering of life history strategies. *Freshwater Biology* 58:50–62.

- 684 Nelson, W. R., and C. H. Walburg. 1977. Population Dynamics of Yellow Perch (*Perca*  
685 *flavescens*), Sauger (*Stizostedion canadense*), and Walleye (*S. vitreum vitreum*) in Four Main  
686 Stem Missouri River Reservoirs. Journal of the Fisheries Research Board of Canada  
687 34:1748–1763.
- 688 Nilsson, C., and K. Berggren. 2000. Alterations of Riparian Ecosystems Caused by River  
689 Regulation Dam operations have caused global-scale ecological changes in riparian  
690 ecosystems. How to protect river environments and human needs of rivers remains one of the  
691 most important questions of our time. BioScience 50:783–792.
- 692 Okada, E. K., A. A. Agostinho, and L. C. Gomes. 2005. Spatial and temporal gradients in  
693 artisanal fisheries of a large Neotropical reservoir, the Itaipu Reservoir, Brazil. Canadian  
694 Journal of Fisheries and Aquatic Sciences 62:714–724.
- 695 Oksanen, J., G. Blanchet, M. Friendly, R. Kindt, P. Legendre, D. McGlinn, P. R. Minchin, R. B.  
696 O’Hara, G. L. Simpson, P. Solymos, H. H. Stevens, E. Szoecs, and H. Wagner. 2016. vegan:  
697 Community Ecology Package. R package version 2.4-1.
- 698 Pelicice, F. M., and A. A. Agostinho. 2008. Fish fauna destruction after the introduction of a  
699 non-native predator (*Cichla kelberi*) in a Neotropical reservoir. Biological Invasions  
700 11:1789–1801.
- 701 Pelicice, F. M., P. S. Pompeu, and A. A. Agostinho. 2015. Large reservoirs as ecological barriers  
702 to downstream movements of Neotropical migratory fish. Fish and Fisheries 16:697–715.
- 703 Penczak, T., and A. Kruk. 2005. Patternizing of impoundment impact (1985–2002) on fish  
704 assemblages in a lowland river using the Kohonen algorithm. Journal of Applied Ichthyology  
705 21:169–177.



- 706 Peres-Neto, P. R., P. Legendre, S. Dray, and D. Borcard. 2006. Variation Partitioning of Species  
707 Data Matrices: Estimation and Comparison of Fractions. *Ecology* 87:2614–2625.
- 708 Poff, N. L., J. D. Olden, D. M. Merritt, and D. M. Pepin. 2007. Homogenization of regional river  
709 dynamics by dams and global biodiversity implications. *Proceedings of the National  
710 Academy of Sciences* 104:5732–5737.
- 711 Purvis, A., and A. Hector. 2000. Getting the measure of biodiversity. *Nature* 405:212–219.
- 712 Pyron, M., C. C. Vaughn, M. R. Winston, and J. Pigg. 1998. Fish Assemblage Structure from 20  
713 Years of Collections in the Kiamichi River, Oklahoma. *The Southwestern Naturalist* 43:336–  
714 343.
- 715 Quinn, J. W., and T. J. Kwak. 2003. Fish Assemblage Changes in an Ozark River after  
716 Impoundment: A Long-Term Perspective. *Transactions of the American Fisheries Society*  
717 132:110–119.
- 718 Renöfalt, B. M., R. Jansson, and C. Nilsson. 2010. Effects of hydropower generation and  
719 opportunities for environmental flow management in Swedish riverine ecosystems:  
720 Hydropower and environmental flow management. *Freshwater Biology* 55:49–67.
- 721 Reyes-Gavilán, F. G., R. Garrido, A. G. Nicieza, M. M. Toledo, and F. Braña. 1996. Fish  
722 community variation along physical gradients in short streams of northern Spain and the  
723 disruptive effect of dams. *Hydrobiologia* 321:155–163.
- 724 Říha, M., J. Kubečka, M. Vašek, J. Seda, T. Mrkvička, M. Prchalová, J. Matěna, M. Hladík, M.  
725 Čech, V. Draštík, J. Frouzová, E. Hohausová, O. Jarolím, T. Jůza, M. Kratochvíl, J. Peterka,  
726 and M. Tušer. 2009. Long-term development of fish populations in the Římov Reservoir.  
727 *Fisheries Management and Ecology* 16:121–129.

- 728 Rodriguez Ruiz, A. 1998. Fish species composition before and after construction of a reservoir  
729 on the Guadalete River (SW Spain). *Archiv für Hydrobiologie* 142:353–369.
- 730 Rosenberg, D. M., F. Berkes, R. A. Bodaly, R. E. Hecky, C. A. Kelly, and J. W. Rudd. 1997.  
731 Large-scale impacts of hydroelectric development. *Environmental Reviews* 5:27–54.
- 732 Rosenberg, D. M., P. McCully, and C. M. Pringle. 2000. Global-Scale Environmental Effects of  
733 Hydrological Alterations: Introduction. *BioScience* 50:746–751.
- 734 Sá-Oliveira, J. C., J. E. Hawes, V. J. Isaac-Nahum, and C. A. Peres. 2015. Upstream and  
735 downstream responses of fish assemblages to an eastern Amazonian hydroelectric dam.  
736 *Freshwater Biology* 60:2037–2050.
- 737 SEforALL. 2016. Sustainable energy for all. Strategic framework for results 2016-2021. Going  
738 further, faster - Together.
- 739 Stoffer, D. 2014. *astsa: Applied Statistical Time Series Analysis*. R package version 1.3.
- 740 Sutela, T., and T. Vehanen. 2008. Effects of water-level regulation on the nearshore fish  
741 community in boreal lakes. *Hydrobiologia* 613:13–20.
- 742 Taylor, C. A., J. H. Knouft, and T. M. Hiland. 2001. Consequences of stream impoundment on  
743 fish communities in a small North American drainage. *Regulated Rivers: Research &*  
744 *Management* 17:687–698.
- 745 Teodoru, C. R., J. Bastien, M.-C. Bonneville, P. A. del Giorgio, M. Demarty, M. Garneau, J.-F.  
746 Hélie, L. Pelletier, Y. T. Prairie, N. T. Roulet, I. B. Strachan, and A. Tremblay. 2012. The net  
747 carbon footprint of a newly created boreal hydroelectric reservoir. *Global Biogeochemical*  
748 *Cycles* 26:GB2016.
- 749 Therrien, J., R. Verdon, and R. Lalumière. 2002. Suivi environnemental du complexe La Grande.  
750 Évolution des communautés de poissons. Rapport synthèse 1977-2000. Page 131 p. et

751 annexes. Groupe conseil GENIVAR inc. et direction Barrages et Environnement, Hydro-  
752 Québec Production.

753 Turgeon, K., C. T. Solomon, C. Nozais, and I. Gregory-Eaves. 2016. Do novel ecosystems  
754 follow predictable trajectories? Testing the trophic surge hypothesis in reservoirs using fish.  
755 *Ecosphere* 7: ecs2.1617.

756 Villéger, S., S. Blanchet, O. Beauchard, T. Oberdorff, and S. Brosse. 2011. Homogenization  
757 patterns of the world's freshwater fish faunas. *Proceedings of the National Academy of*  
758 *Sciences* 108:18003–18008.

759 Vörösmarty, C. J., P. B. McIntyre, M. O. Gessner, D. Dudgeon, A. Prusevich, P. Green, S.  
760 Glidden, S. E. Bunn, C. A. Sullivan, C. R. Liermann, and P. M. Davies. 2010. Global threats  
761 to human water security and river biodiversity. *Nature* 467:555–561.

762 Ward, J. V., and J. A. Stanford. 1983. The Serial Discontinuity Concept of River Ecosystems.  
763 *Page Dynamics of lotic ecosystems*. In T.D. Fontaine, S. M. Bartell. Ann Arbor Science.

764 Ward, J. V., and J. A. Stanford. 1995. The serial discontinuity concept: Extending the model to  
765 floodplain rivers. *Regulated Rivers: Research & Management* 10:159–168.

766 Whittaker, R. J., K. J. Willis, and R. Field. 2001. Scale and species richness: towards a general,  
767 hierarchical theory of species diversity. *Journal of Biogeography* 28:453–470.

768 Wiens, J. A. 1989. Spatial Scaling in Ecology. *Functional Ecology* 3:385–397.

769 Winemiller, K. O., P. B. McIntyre, L. Castello, E. Fluet-Chouinard, T. Giarrizzo, S. Nam, I. G.  
770 Baird, W. Darwall, N. K. Lujan, I. Harrison, M. L. J. Stiassny, R. a. M. Silvano, D. B.  
771 Fitzgerald, F. M. Pelicice, A. A. Agostinho, L. C. Gomes, J. S. Albert, E. Baran, M. Petrere,  
772 C. Zarfl, M. Mulligan, J. P. Sullivan, C. C. Arantes, L. M. Sousa, A. A. Koning, D. J.  
773 Hoeninghaus, M. Sabaj, J. G. Lundberg, J. Armbruster, M. L. Thieme, P. Petry, J. Zuanon, G.

774 T. Vilara, J. Snoeks, C. Ou, W. Rainboth, C. S. Pavanelli, A. Akama, A. van Soesbergen, and  
775 L. Sáenz. 2016. Balancing hydropower and biodiversity in the Amazon, Congo, and Mekong.  
776 *Science* 351:128–129.

777 Zarfl, C., A. E. Lumsdon, J. Berlekamp, L. Tydecks, and K. Tockner. 2014. A global boom in  
778 hydropower dam construction. *Aquatic Sciences* 77:161–170.

779 Zohary, T., and I. Ostrovsky. 2011. Ecological impacts of excessive water level fluctuations in  
780 stratified freshwater lakes. *Inland Waters* 1:47–59.

781

782 **Table 1.** Reservoirs characteristics in the La Grande hydroelectricity complex (Opinaca,  
 783 Robert-Bourassa and Caniapiscau) and in Sainte-Marguerite 3 reservoir. Reservoir area  
 784 represents the surface covered with water at maximum pool. The area flooded represents the  
 785 surface of terrestrial land flooded following impoundment and, in brackets, the percentage of  
 786 the reservoir that was terrestrial land before impoundment.

| Variables                              | Reservoirs   |                 |              |                   |
|----------------------------------------|--------------|-----------------|--------------|-------------------|
|                                        | Opinaca      | Robert-Bourassa | Caniapiscau  | Ste. Marguerite 3 |
| <b>Latitude</b>                        | 52°38'58"N   | 53°45'00"N      | 54°31'46"N   | 50°42'52"N        |
| <b>Longitude</b>                       | 76°19'54"W   | 77°00'00"W      | 69°51'18"W   | 66°46'54"W        |
| <b>Trophic status</b>                  | Oligotrophic | Oligotrophic    | Oligotrophic | Oligotrophic      |
| <b>Area (km<sup>2</sup>)</b>           | 1040         | 2835            | 4275         | 262               |
| <b>Area flooded (km<sup>2</sup>)</b>   | 740 (71%)    | 2630 (92%)      | 3430 (80%)   | 230.5 (88%)       |
| <b>Volume (km<sup>3</sup>)</b>         | 8.4          | 61.7            | 53.8         | 12.5              |
| <b>Year of impoundment</b>             | 1980         | 1979            | 1982         | 1998              |
| <b>Filling time (y)</b>                | 0.5          | 1               | 2            | 4                 |
| <b>Residency time (days)</b>           | 124          | 183             | 803          | 366               |
| <b>Mean depth (m)</b>                  | 8            | 22              | 12           | 22.4              |
| <b>Max depth (m)</b>                   | 51           | 137             | 49           | 145               |
| <b>Annual drawdown (m)</b>             | 3.6          | 3.3             | 2.1          | 14                |
| <b>Watershed area (km<sup>2</sup>)</b> | 30 000       | 97 643          | 36 800       | 9 000             |
| <b>Extrapolated richness</b>           | 11.1 ± 3.7   | 9.9 ± 3.1       | 9.3 ± 2.7    | 7.5 ± 3.1         |
| <b>Diversity (H' Shannon)</b>          | 1.53 ± 0.28  | 1.48 ± 0.27     | 1.40 ± 0.28  | 1.23 ± 0.38       |
| <b>Evenness (J' Pielou)</b>            | 0.76 ± 0.13  | 0.78 ± 0.12     | 0.72 ± 0.13  | 0.87 ± 0.11       |

787

788 **Table 2.** Estimate  $\pm$  Standard error (SE), 95% Confidence intervals (95% CI), t-values and Degrees of Freedom (DF) of model  
 789 parameters used to predict change in extrapolated richness (Double jackknife estimation method), diversity (Shannon's H') and  
 790 evenness (Pielou's J') in La Grande mega-hydroelectricity complex (3 reservoirs, 23 stations). General linear mixed effects models  
 791 were used to evaluate the effect of time since impoundment (TSI), stations types (Impacted stations vs. reference sites) and their  
 792 interaction on diversity metrics. Predictors that did not include 0 within their 95% CI (*i.e.*, statistically "significant") are in bold.  
 793 Reference sites are used as contrasts in the models.

| Model parameter                                             | Extrapolated richness                   |                 | Diversity (Shannon's H')                                          |                              | Evenness (Pielou's J')                                            |                              |
|-------------------------------------------------------------|-----------------------------------------|-----------------|-------------------------------------------------------------------|------------------------------|-------------------------------------------------------------------|------------------------------|
|                                                             | Estimate $\pm$ SE<br>(95% CI)           | t-value<br>(DF) | Estimate $\pm$ SE<br>(95% CI)                                     | t-value<br>(DF)              | Estimate $\pm$ SE<br>(95% CI)                                     | t-value<br>(DF)              |
| <b>All impacted stations combined</b>                       |                                         |                 |                                                                   |                              |                                                                   |                              |
| Intercept                                                   | -0.073 $\pm$ 0.309<br>(-0.678 to 0.532) | -0.236<br>(171) | 0.485 $\pm$ 0.248<br>(-0.001 to 0.972)                            | 1.954<br>(171)               | 0.421 $\pm$ 0.292<br>(-0.151 to 0.993)                            | 1.443<br>(171)               |
| Time since impoundment<br>(TSI)                             | 0.042 $\pm$ 0.179<br>(-0.309 to 0.393)  | 0.233<br>(171)  | -0.184 $\pm$ 0.218<br>(-0.610 to 0.243)                           | -0.844<br>(171)              | -0.145 $\pm$ 0.191<br>(-0.520 to 0.231)                           | -0.755<br>(171)              |
| Ref vs. Impacted (RI)                                       | 0.052 $\pm$ 0.331<br>(-0.596 to 0.701)  | 0.159<br>(21)   | <b>-0.562 <math>\pm</math> 0.266</b><br><b>(-1.085 to -0.040)</b> | <b>-2.111</b><br><b>(21)</b> | -0.505 $\pm$ 0.312<br>(-1.117 to 0.107)                           | -1.616<br>(21)               |
| TSI*RI                                                      | -0.186 $\pm$ 0.194<br>(-0.566 to 0.193) | -0.962<br>(171) | 0.108 $\pm$ 0.235<br>(-0.352 to 0.569)                            | 0.461<br>(171)               | 0.206 $\pm$ 0.206<br>(-0.199 to 0.611)                            | 0.998<br>(171)               |
| <b>Upstream (Up) and downstream (D) stations separately</b> |                                         |                 |                                                                   |                              |                                                                   |                              |
| Intercept                                                   | -0.069 $\pm$ 0.270<br>(-0.598 to 0.461) | -0.254<br>(170) | 0.480 $\pm$ 0.250<br>(-0.010 to 0.969)                            | 1.920<br>(170)               | 0.424 $\pm$ 0.286<br>(-0.136 to 0.984)                            | 1.483<br>(170)               |
| TSI                                                         | 0.036 $\pm$ 0.175<br>(-0.308 to 0.380)  | 0.207<br>(170)  | -0.176 $\pm$ 0.227<br>(-0.620 to 0.269)                           | -0.776<br>(170)              | -0.147 $\pm$ 0.190<br>(-0.518 to 0.225)                           | -0.775<br>(170)              |
| Ref vs. D                                                   | 0.592 $\pm$ 0.350<br>(-0.094 to 1.277)  | 1.692<br>(20)   | -0.388 $\pm$ 0.323<br>(-1.020 to 0.244)                           | -1.203<br>(20)               | <b>-0.778 <math>\pm</math> 0.370</b><br><b>(-1.502 to -0.053)</b> | <b>-2.104</b><br><b>(20)</b> |
| Ref vs. Up                                                  | -0.098 $\pm$ 0.295<br>(-0.676 to 0.480) | -0.333<br>(20)  | <b>-0.609 <math>\pm</math> 0.273</b><br><b>(-1.144 to -0.074)</b> | <b>-2.233</b><br>(20)        | -0.432 $\pm$ 0.311<br>(-1.043 to 0.178)                           | -1.388<br>(20)               |
| TSI*Ref. vs D                                               | -0.309 $\pm$ 0.226<br>(-0.752 to 0.134) | -1.366<br>(170) | 0.239 $\pm$ 0.295<br>(-0.339 to 0.817)                            | 0.811<br>(170)               | 0.316 $\pm$ 0.244<br>(-0.163 to 0.794)                            | 1.294<br>(170)               |

|                                                                                       |                                     |                 |                                                    |                       |                                                    |                       |
|---------------------------------------------------------------------------------------|-------------------------------------|-----------------|----------------------------------------------------|-----------------------|----------------------------------------------------|-----------------------|
| TSI*Ref. vs Up                                                                        | -0.149 ± 0.194<br>(-0.530 to 0.232) | -0.767<br>(170) | 0.055 ± 0.250<br>(-0.435 to 0.545)                 | 0.220<br>(170)        | 0.177 ± 0.209<br>(-0.233 to 0.588)                 | 0.848<br>(170)        |
| <b>Upstream river (UR), upstream lake (UL) and downstream (D) stations separately</b> |                                     |                 |                                                    |                       |                                                    |                       |
| Intercept                                                                             | -0.071 ± 0.271<br>(-0.603 to 0.461) | -0.261<br>(169) | 0.488 ± 0.248<br>(0.003 to 0.974)                  | 1.971<br>(169)        | 0.441 ± 0.247<br>(-0.044 to 0.926)                 | 1.783<br>(169)        |
| TSI                                                                                   | 0.035 ± 0.178<br>(-0.312 to 0.383)  | 0.200<br>(169)  | -0.192 ± 0.206<br>(-0.595 to 0.211)                | -0.934<br>(169)       | -0.164 ± 0.175<br>(-0.508 to 0.180)                | -0.936<br>(169)       |
| Ref vs. D                                                                             | 0.593 ± 0.351<br>(-0.095 to 1.282)  | 1.690<br>(19)   | -0.401 ± 0.320<br>(-1.029 to 0.226)                | -1.254<br>(19)        | <b>-0.792 ± 0.319</b><br><b>(-1.418 to -0.167)</b> | <b>-2.484</b><br>(19) |
| Ref vs. UL                                                                            | -0.024 ± 0.308<br>(-0.628 to 0.580) | -0.078<br>(19)  | <b>-0.654 ± 0.282</b><br><b>(-1.208 to -0.101)</b> | <b>-2.316</b><br>(19) | <b>-0.655 ± 0.281</b><br><b>(-1.206 to -0.104)</b> | <b>-2.329</b><br>(19) |
| Ref vs. UR                                                                            | -0.233 ± 0.338<br>(-0.895 to 0.429) | -0.689<br>(19)  | -0.544 ± 0.309<br>(-1.149 to 0.061)                | -1.762<br>(19)        | -0.044 ± 0.307<br>(-0.646 to 0.559)                | -0.142<br>(19)        |
| TSI*Ref. vs D                                                                         | -0.309 ± 0.229<br>(-0.757 to 0.139) | -1.351<br>(169) | 0.249 ± 0.267<br>(-0.274 to 0.773)                 | 0.934<br>(169)        | 0.336 ± 0.226<br>(-0.108 to 0.779)                 | 1.483<br>(169)        |
| TSI*Ref. vs UL                                                                        | -0.120 ± 0.206<br>(-0.524 to 0.284) | -0.581<br>(169) | 0.233 ± 0.237<br>(-0.232 to 0.698)                 | 0.981<br>(169)        | 0.311 ± 0.204<br>(-0.089 to 0.711)                 | 1.524<br>(169)        |
| TSI*Ref. vs UR                                                                        | -0.202 ± 0.228<br>(-0.650 to 0.246) | -0.884<br>(169) | -0.244 ± 0.265<br>(-0.764 to 0.276)                | -0.918<br>(169)       | -0.030 ± 0.226<br>(-0.473 to 0.413)                | -0.133<br>(169)       |

794 **Table 3.** Estimate  $\pm$  Standard error (SE), 95% Confidence intervals (95% CI) and t-values of model parameters used to predict change  
 795 in extrapolated richness (Double jackknife estimation), diversity (Shannon-Weaver H') and evenness (Pielou J') in La Grande  
 796 complex reservoirs and Ste-Marguerite 3 reservoir. Generalized mixed effects models were used to evaluate the effect of time since  
 797 impoundment (Year), stations and their interaction on diversity metrics. Reference sites are used as contrasts.

| Model parameter        | Extrapolated richness                   |                 | Diversity (H')                          |                 | Evenness (J')                           |                 |
|------------------------|-----------------------------------------|-----------------|-----------------------------------------|-----------------|-----------------------------------------|-----------------|
|                        | Estimate $\pm$ SE<br>(95% CI)           | t-value<br>(DF) | Estimate $\pm$ SE<br>(95% CI)           | t-value<br>(DF) | Estimate $\pm$ SE<br>(95% CI)           | t-value<br>(DF) |
| <b>Robert-Bourassa</b> |                                         |                 |                                         |                 |                                         |                 |
| Intercept              | -0.325 $\pm$ 0.500<br>(-1.305 to 0.655) | -0.650<br>(70)  | 0.380 $\pm$ 0.357<br>(-0.301 to 1.061)  | 1.066<br>(70)   | 0.609 $\pm$ 0.375<br>(-0.111 to 1.328)  | 1.622<br>(70)   |
| TSI                    | -0.003 $\pm$ 0.270<br>(-0.531 to 0.526) | -0.011<br>(70)  | -0.450 $\pm$ 0.245<br>(-0.929 to 0.032) | -1.835<br>(70)  | -0.457 $\pm$ 0.254<br>(-0.955 to 0.041) | -1.798<br>(70)  |
| Ref vs. Impacted (RI)  | 0.361 $\pm$ 0.535<br>(-0.689 to 1.410)  | 0.674<br>(6)    | -0.430 $\pm$ 0.383<br>(-1.022 to 0.144) | -1.122<br>(6)   | -0.683 $\pm$ 0.403<br>(-1.450 to 0.094) | -1.696<br>(6)   |
| TSI*RI                 | -0.232 $\pm$ 0.296<br>(-0.812 to 0.348) | -0.784<br>(70)  | 0.099 $\pm$ 0.270<br>(-0.451 to 0.615)  | 0.365<br>(70)   | 0.351 $\pm$ 0.281<br>(-0.211 to 0.890)  | 1.250<br>(70)   |
| <b>Opinaca</b>         |                                         |                 |                                         |                 |                                         |                 |
| Intercept              | 0.058 $\pm$ 0.604<br>(-1.125 to 1.241)  | 0.096<br>(62)   | 0.539 $\pm$ 0.527<br>(-0.468 to 1.545)  | 1.023<br>(62)   | 0.362 $\pm$ 0.587<br>(-0.761 to 1.484)  | 0.616<br>(62)   |
| TSI                    | 0.011 $\pm$ 0.299<br>(-0.576 to 0.598)  | 0.037<br>(62)   | -0.143 $\pm$ 0.293<br>(-0.716 to 0.430) | -0.490<br>(62)  | 0.022 $\pm$ 0.282<br>(-0.531 to 0.574)  | 0.076<br>(62)   |
| Ref vs. Impacted (RI)  | -0.061 $\pm$ 0.652<br>(-1.339 to 1.217) | -0.094<br>(5)   | -0.628 $\pm$ 0.569<br>(-1.715 to 0.459) | -1.104<br>(5)   | -0.431 $\pm$ 0.634<br>(-1.645 to 0.780) | -0.681<br>(5)   |
| TSI*RI                 | -0.118 $\pm$ 0.323<br>(-0.751 to 0.515) | -0.366<br>(62)  | 0.200 $\pm$ 0.316<br>(-0.419 to 0.818)  | 0.632<br>(62)   | 0.156 $\pm$ 0.305<br>(-0.439 to 0.753)  | 0.511<br>(62)   |
| <b>Caniapiscau</b>     |                                         |                 |                                         |                 |                                         |                 |
| Intercept              | -0.061 $\pm$ 0.514<br>(-1.068 to 0.945) | -0.120<br>(35)  | 0.346 $\pm$ 0.501<br>(-0.612 to 1.303)  | 0.690<br>(35)   | 0.214 $\pm$ 0.579<br>(-0.612 to 1.303)  | 0.369<br>(35)   |
| TSI                    | 0.559 $\pm$ 0.528<br>(-0.475 to 1.593)  | 1.060<br>(35)   | 0.532 $\pm$ 0.514<br>(-0.451 to 1.515)  | 1.034<br>(35)   | 0.347 $\pm$ 0.505<br>(-0.451 to 1.515)  | 0.688<br>(35)   |
| Ref vs. Impacted (RI)  | 0.031 $\pm$ 0.538<br>(-1.024 to 1.086)  | 0.057<br>(6)    | -0.410 $\pm$ 0.525<br>(-1.413 to 0.593) | -0.782<br>(6)   | -0.244 $\pm$ 0.612<br>(-1.413 to 0.593) | -0.400<br>(6)   |



|                         |                                     |                |                                     |                |                                                    |                |
|-------------------------|-------------------------------------|----------------|-------------------------------------|----------------|----------------------------------------------------|----------------|
| TSI*RI                  | -0.672 ± 0.552<br>(-1.753 to 0.410) | -1.217<br>(35) | -0.376 ± 0.538<br>(-1.405 to 0.652) | -0.700<br>(35) | -0.194 ± 0.529<br>(-1.405 to 0.652)                | -0.366<br>(35) |
| <b>Ste-Marguerite 3</b> |                                     |                |                                     |                |                                                    |                |
| Intercept               | 0.162 ± 0.659<br>(-1.130 to 1.454)  | 0.876<br>(7)   | -0.627 ± 0.585<br>(-1.676 to 0.422) | -1.072<br>(7)  | <b>-1.457 ± 0.398</b><br><b>(-2.164 to -0.751)</b> | -3.660<br>(7)  |
| TSI                     | -0.297 ± 0.569<br>(-1.412 to 0.817) | 0.117<br>(7)   | 0.063 ± 0.504<br>(-0.840 to 0.967)  | 0.125<br>(7)   | 0.056 ± 0.343<br>(-0.553 to 0.666)                 | 0.164<br>(7)   |
| Ref vs. Impacted (RI)   | -0.199 ± 0.751<br>(-1.670 to 1.273) | -0.979<br>(2)  | 0.785 ± 0.654<br>(-0.388 to 1.957)  | 1.199<br>(2)   | <b>1.863 ± 0.450</b><br><b>(1.062 to 2.661)</b>    | 4.144<br>(2)   |
| TSI*RI                  | 0.302 ± 0.697<br>(-1.063 to 1.667)  | 0.488<br>(7)   | 0.286 ± 0.598<br>(-0.786 to 1.357)  | 0.478<br>(7)   | -0.174 ± 0.411<br>(-0.905 to 0.557)                | -0.423<br>(7)  |

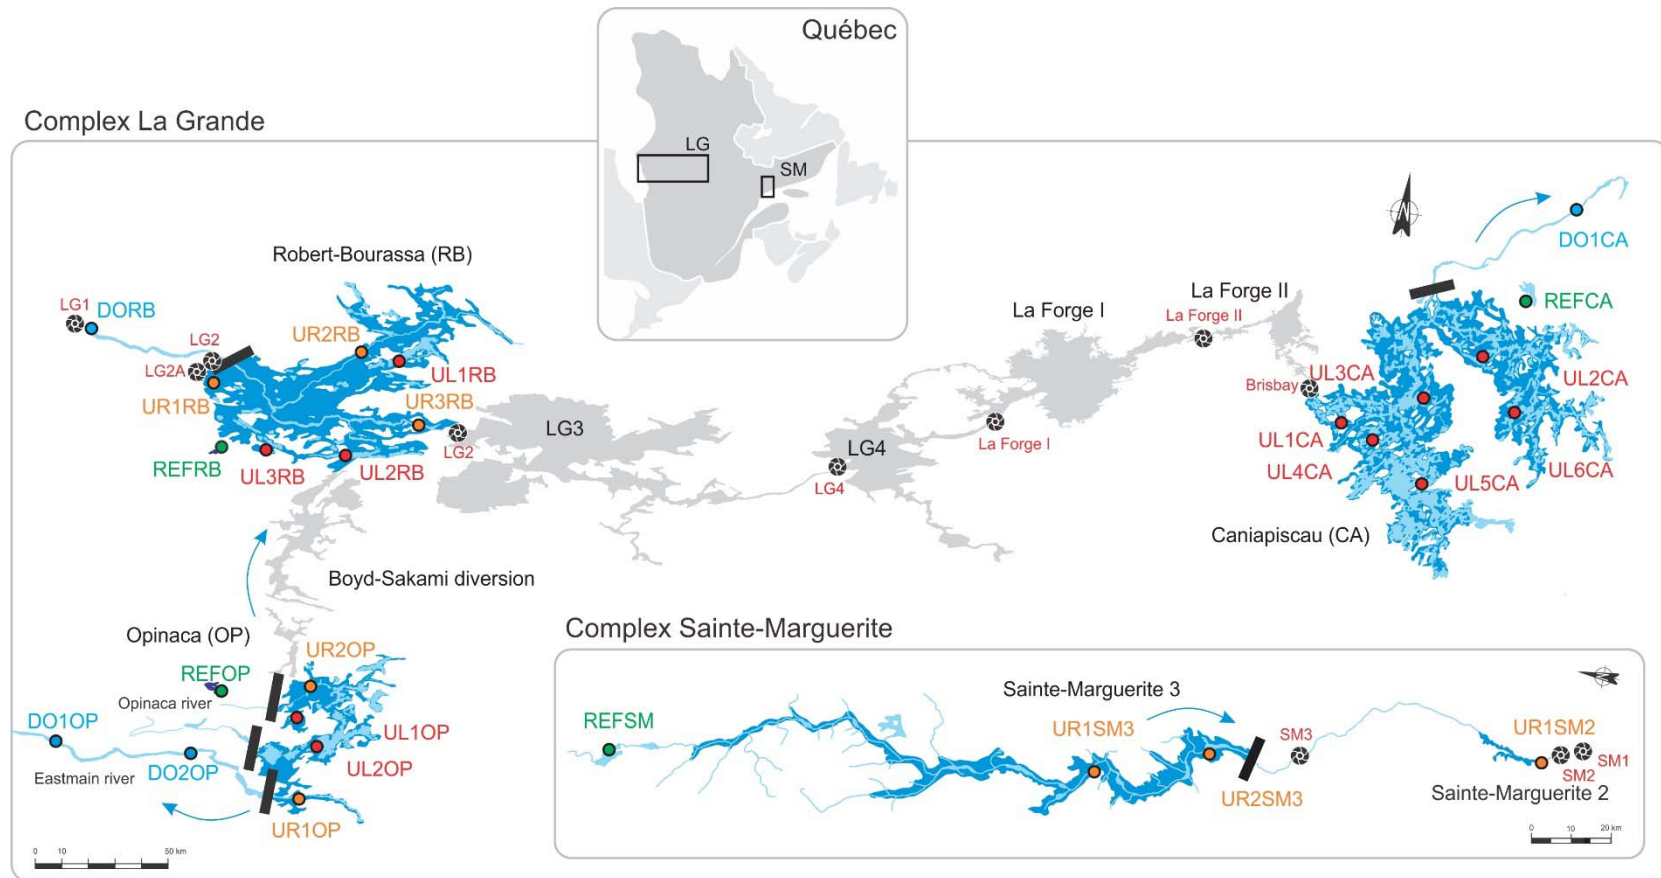

Figure 1. Map representing the before and after impoundment hydrology conditions and the location of the 23 sampling stations in the La Grande hydroelectricity complex (three reservoirs; Robert-Bourassa, Opinaca and Caniapiscau) and 4 sampling stations in Sainte-Marguerite complex, Northern Québec. Before impoundment hydrology conditions are in light blue and after impoundment conditions (reservoirs) are in dark blue. Stations located upstream of the dams that were in a river before impoundment are in orange, and the ones that were in lakes before impoundment are in red. Sampling stations that were located downstream of the dams are in blue, and reference sites paired with each reservoir are in green. Dams are represented by a black line and power station by a turbine symbol.

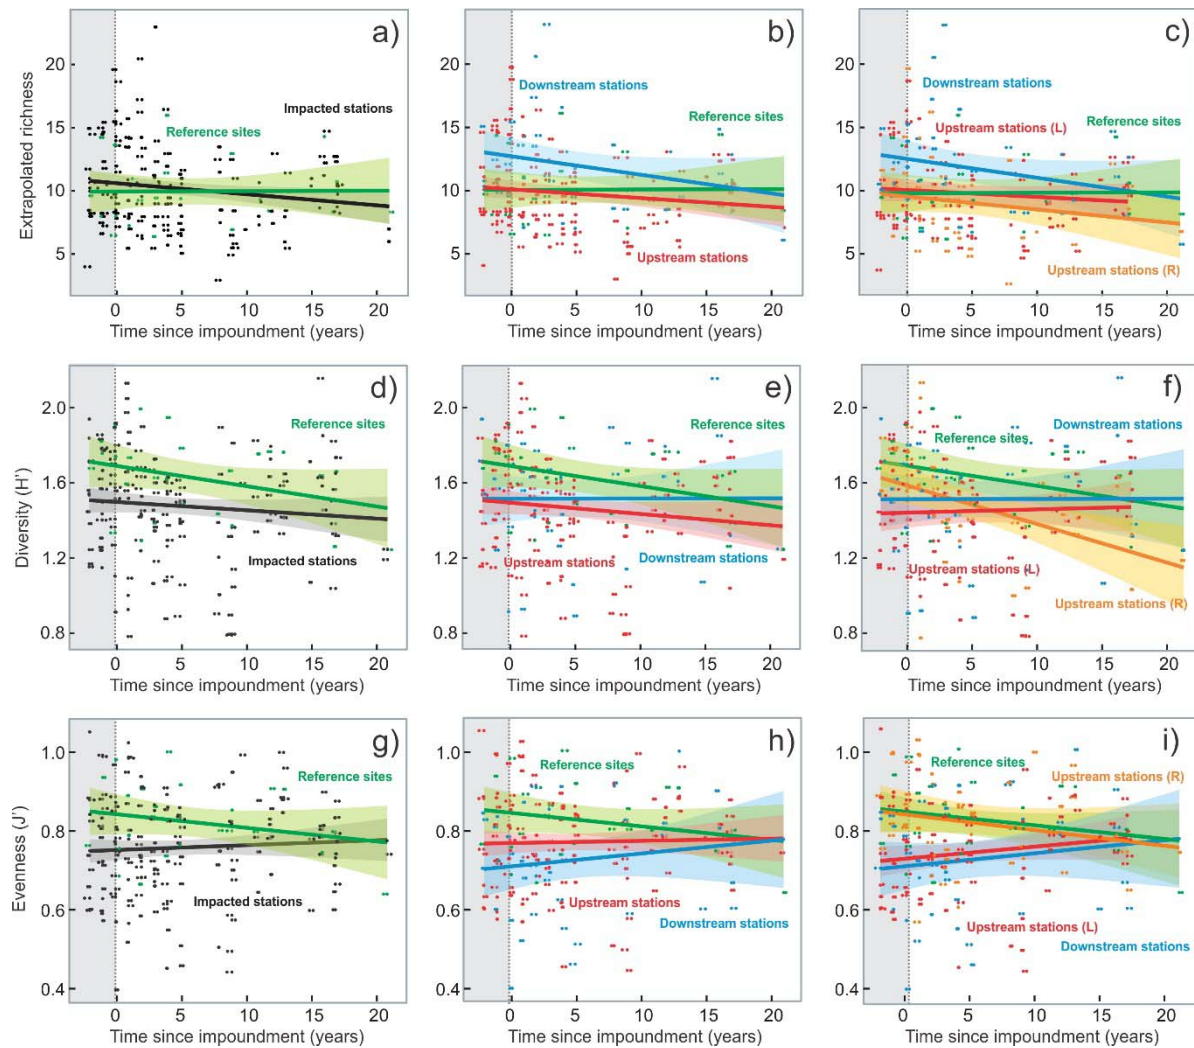

Figure 2. Variation in extrapolated richness, diversity ( $H'$  Shannon-Weaver index) and evenness ( $J'$  Pielou index) over time in impacted and reference stations at the LG complex level. Change in richness, diversity and evenness over time in references sites (green dots and lines) where compared with impacted stations (all impacted station types combined from the three reservoirs in a, d, g panels, with impacted stations upstream and downstream of the dams in b, e, h panels, and compared with upstream stations that were lakes before being a reservoir (UL) with upstream stations that were a river or a stream before being a reservoir (UR) in c, f, i panels.

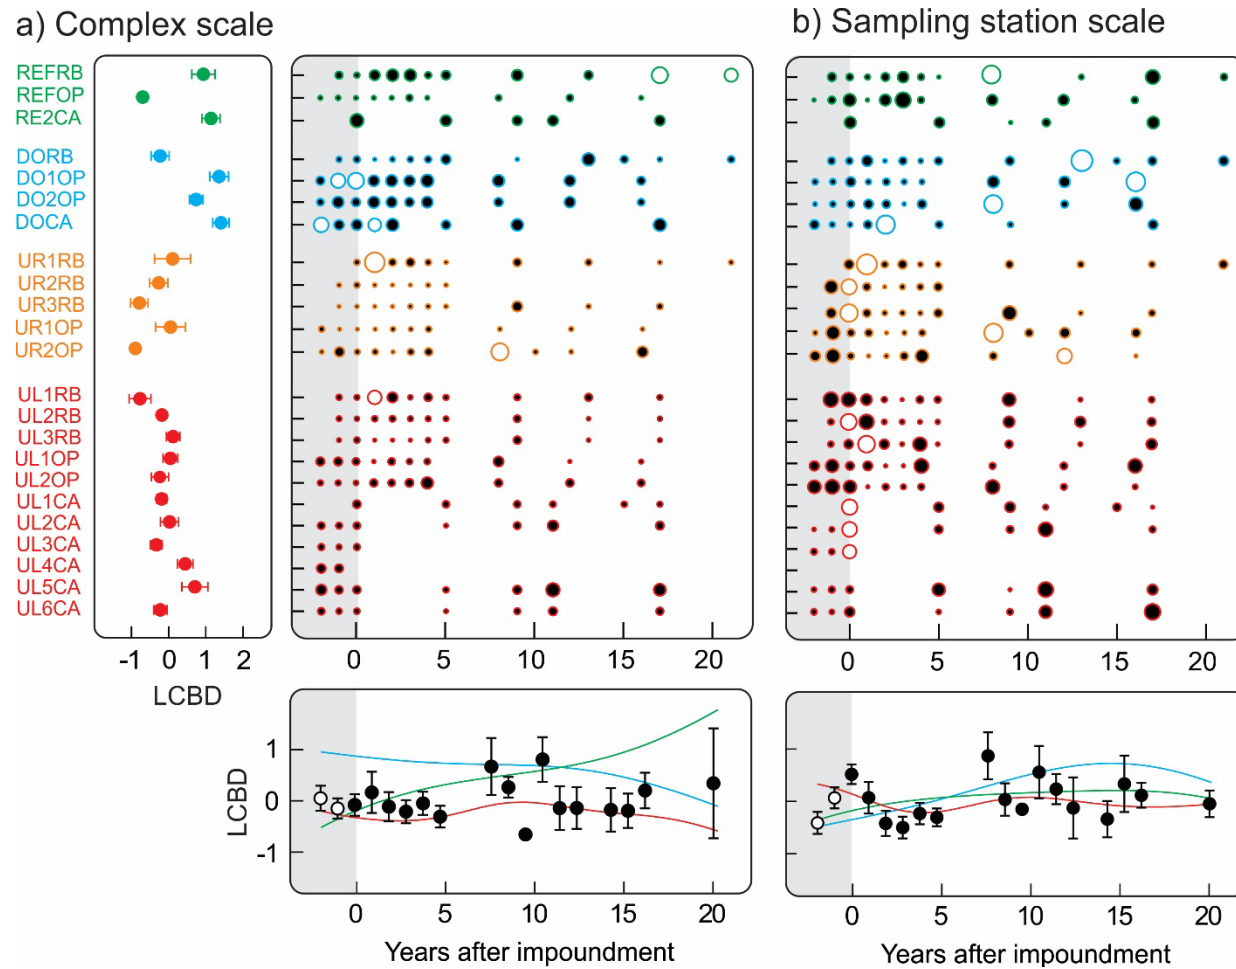

Figure 3. Local contribution to beta-diversity (LCBD) per station (24 stations) and year for beta-diversity analysis b) at the LG complex level and a) at the sampling station level. Circle surface areas are proportional to the LCBD values. Circles filled in white indicate significant LCBD indices at  $p < 0.05$ . The lower panels represent mean values of LCBD per year. The right panel represents mean values of LCBD per station for the analysis at the complex level. Upstream stations are separated in two categories. Stations with a label starting with “UL” represent stations that were lakes before being a reservoir and the stations with a label starting with “UR” were rivers or stream before being a reservoir. Reference sites are labelled in green, downstream stations in blue and upstream stations in orange (UR) and red (UL).

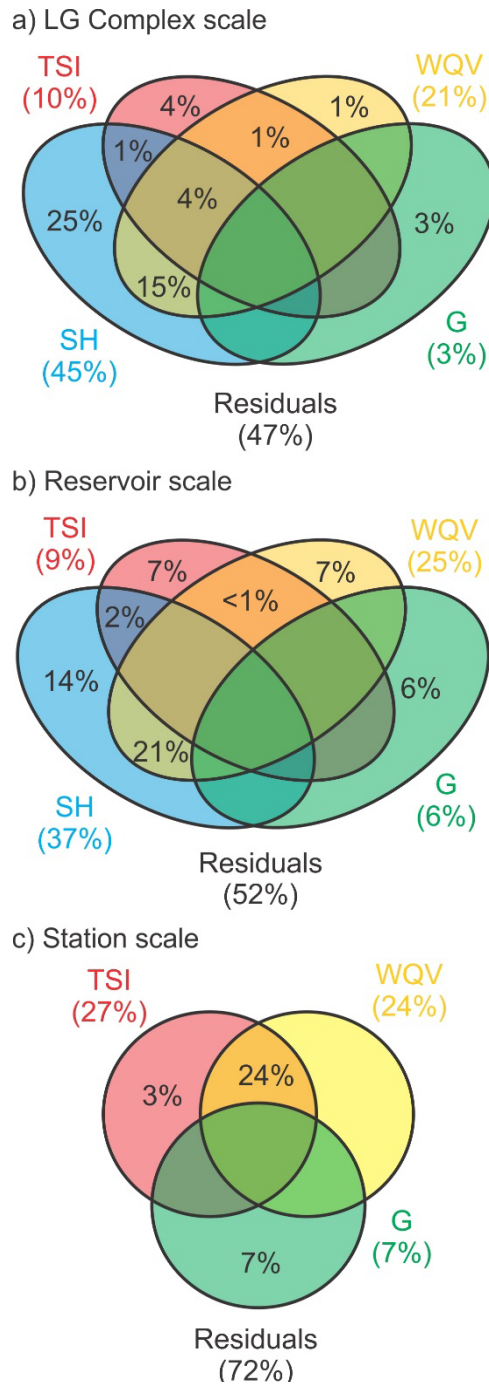

Figure 4. a) Variation partitioning analysis showing the contribution of four matrices (Time since impoundment [TSI], Spatial heterogeneity [SH], Water quality variables [WQ] and fishing gear [G]) to explained the variation in fish species assemblages at the a) LG complex level, b) at the reservoir level (the numbers are the average across reservoirs, see table B1 for the breakdown per reservoir), and c) at the sampling stations (the numbers are the average across sampling stations, see Appendix S4: table S2 for the breakdown per station). These analyses included reference sites.



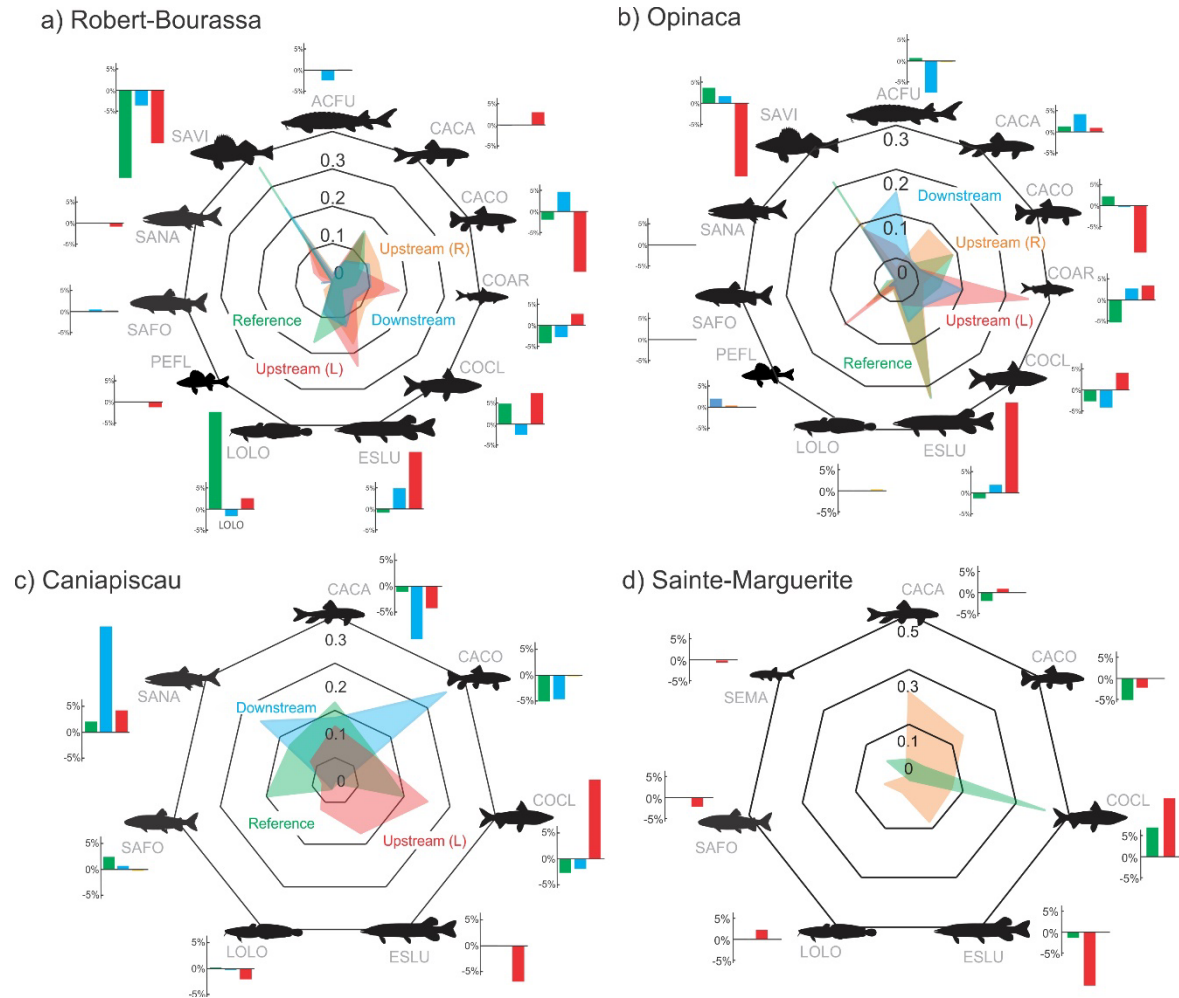

Figure 5. Radar chart graphs of species contributions to beta-diversity (SCBD) computed for each sampling stations, and pooled for a) Robert-Bourassa, b) Opinaca and c) Caniapiscau and d) Sainte-Marguerite. SCBDs determine which species exhibit large variations among year in each sampling stations. The absolute direction of a change for a given species, comparing % change in abundance before (average values) and after impoundment (average values) for each species is also presented beside each species. Green bars represent reference sites, blue bars represent downstream stations and red bars represents upstream stations (UL and UR combined). Only the ten most common species are pictured.
